# Supplementary material for: The tricuspid valve also maladapts as shown in sheep with biventricular heart failure
Source: eLife. 2020 Dec 15;9:e63855. doi: 10.7554/eLife.63855 (PMC7738185; doi:10.7554/eLife.63855)
Supplement: Supplementary file 1. [file elife-63855-supp1.xlsx]

## Sheet: Sheet A - Expression
	Mapped IDs	Panther family	String	String	Fasta headers and IDs	Fasta headers	CTL1	CTL2	CTL3	TIC1	TIC2	TIC3	CTL1	CTL2	CTL3	TIC1	TIC2	TIC3
W5PH55	W5PH55		OAS2	OAS2 - Uncharacterized protein; 2'-5'-oligoadenylate synthetase 2, 69/71kDa [a.k.a. OAS1, ENSOARP00000009772, AMGL01039515, W5PH55]	W5PH55_SHEEP Uncharacterized protein OS=Ovis aries OX=9940 PE=4 SV=1	W5PH55_SHEEP	28.7638	28.7891	29.0323	24.5528	24.3109	25.144	4.5578e+08	4.63863e+08	5.4901e+08	2.46107e+07	2.08113e+07	3.70762e+07	0.0561727
W5P564	W5P564	no known family	MAP1B	MAP1B - Microtubule-associated protein 1B [a.k.a. XP_014956739, XM_004016901.1, AMGL01034232, W5P564]	W5P564_SHEEP Isoform of W5P563, Uncharacterized protein OS=Ovis aries OX=9940 GN=MAP1B PE=4 SV=1	W5P564_SHEEP	27.7841	27.5519	27.5759	23.601	22.0829	26.2293	2.31121e+08	1.96766e+08	2.00069e+08	1.27234e+07	4.44234e+06	7.86687e+07	0.152613
W5Q284	W5Q284		HAPLN1	HAPLN1 - Hyaluronan and proteoglycan link protein 1 [a.k.a. ENSOART00000017060, UPI0003CCDDC1, ENSOARP00000016822, W5Q284]	W5Q284_SHEEP Uncharacterized protein OS=Ovis aries OX=9940 GN=HAPLN1 PE=4 SV=1	W5Q284_SHEEP	29.6172	29.3379	30.3942	25.0554	26.6354	26.0545	8.23517e+08	6.78576e+08	1.4111e+09	3.48683e+07	1.04243e+08	6.96942e+07	0.0716757
W5Q438	W5Q438		GNB2	GNB2 - G protein subunit beta 2 [a.k.a. GNB2-201, oas:101102864, XP_004021056, W5Q438]	W5Q438_SHEEP Uncharacterized protein OS=Ovis aries OX=9940 GN=GNB2 PE=4 SV=1	W5Q438_SHEEP	29.7764	29.6428	29.8961	25.1926	27.4155	25.9173	9.19586e+08	8.38229e+08	9.99104e+08	3.8348e+07	1.79009e+08	6.3372e+07	0.101827
W5PXE5	W5PXE5		ATAD1	ATAD1 - ATPase family, AAA domain containing 1; Belongs to the AAA ATPase family [a.k.a. W5PXE5, ATPase family, AAA domain containing 1, ENSOART00000015349]	W5PXE5_SHEEP Uncharacterized protein OS=Ovis aries OX=9940 GN=ATAD1 PE=3 SV=1	W5PXE5_SHEEP	26.0453	25.9866	26.7653	22.2265	23.4584	24.2221	6.92519e+07	6.64865e+07	1.14068e+08	4.9074e+06	1.15261e+07	1.95691e+07	0.144122
W5NZR9	W5NZR9		PSMC1	PSMC1 - Proteasome (prosome, macropain) 26S subunit, ATPase, 1; Belongs to the AAA ATPase family [a.k.a. XP_012037609.1, W5NZR9_SHEEP, ENSOART00000003734, W5NZR9]	W5NZR9_SHEEP Uncharacterized protein OS=Ovis aries OX=9940 GN=PSMC1 PE=3 SV=1	W5NZR9_SHEEP	26.9675	27.5807	27.298	22.0991	26.1395	24.4051	1.31227e+08	2.00736e+08	1.65018e+08	4.49265e+06	7.39198e+07	2.22163e+07	0.20248
W5NWF7	W5NWF7		TUFM	TUFM - Elongation factor Tu; This protein promotes the GTP-dependent binding of aminoacyl-tRNA to the A-site of ribosomes during protein biosynthesis [a.k.a. XP_011960184, ENSOART00000002556, Oar.8637, W5NWF7]	W5NWF7_SHEEP Elongation factor Tu OS=Ovis aries OX=9940 GN=TUFM PE=3 SV=1	W5NWF7_SHEEP	30.6379	31.179	30.7739	26.0605	29.5985	26.5365	1.67077e+09	2.4311e+09	1.83594e+09	6.99826e+07	8.12891e+08	9.73374e+07	0.165079
W5PUT6	W5PUT6		CLTC	CLTC - Clathrin heavy chain; Clathrin is the major protein of the polyhedral coat of coated pits and vesicles [a.k.a. XP_012040607, CLTCL2, W5PUT6_SHEEP, W5PUT6]	W5PUT6_SHEEP Clathrin heavy chain OS=Ovis aries OX=9940 GN=CLTC PE=3 SV=1	W5PUT6_SHEEP	30.542	30.9538	30.9435	25.7685	28.5475	27.8854	1.56336e+09	2.07979e+09	2.06497e+09	5.71599e+07	3.9234e+08	2.47939e+08	0.122184
W5PNK3	W5PNK3		ACAN	ACAN - Aggrecan [a.k.a. Oar.4995, AMGL01041409, ENSOART00000012205, W5PNK3]	W5PNK3_SHEEP Uncharacterized protein OS=Ovis aries OX=9940 GN=ACAN PE=4 SV=1	W5PNK3_SHEEP	28.5	28.1921	29.1412	25.6464	27.4772	23.3859	3.79628e+08	3.06672e+08	5.9208e+08	5.25211e+07	1.86836e+08	1.09608e+07	0.195809
W5P994	W5P994		LONP1	LONP1 - Lon protease homolog, mitochondrial; ATP-dependent serine protease that mediates the selective degradation of misfolded, unassembled or oxidatively damaged polypeptides as well as certain short-lived regulatory proteins in the mitochondrial matrix. May also have a chaperone function in the assembly of inner membrane protein complexes. Participates in the regulation of mitochondrial gene e…	W5P994_SHEEP Lon protease homolog, mitochondrial OS=Ovis aries OX=9940 GN=LONP1 PE=3 SV=1	W5P994_SHEEP	29.642	29.6822	29.2896	24.8002	28.5558	25.8938	8.37796e+08	8.61441e+08	6.56233e+08	2.92155e+07	3.94599e+08	6.23482e+07	0.206397
W5NZX9	W5NZX9		SPTBN1	SPTBN1 - Spectrin, beta, non-erythrocytic 1; Belongs to the spectrin family [a.k.a. LOC101102133, LOC101102381, W5NZX9]	W5NZX9_SHEEP Spectrin beta chain OS=Ovis aries OX=9940 GN=SPTBN1 PE=3 SV=1	W5NZX9_SHEEP	30.3934	31.0638	30.7527	25.8883	27.9814	28.6117	1.41036e+09	2.24464e+09	1.80917e+09	6.21081e+07	2.64995e+08	4.10199e+08	0.134934
W5PNT5	W5PNT5		PSMD6	PSMD6 - Proteasome (prosome, macropain) 26S subunit, non-ATPase, 6 [a.k.a. XP_004018394.1, PSMD6-201, W5PNT5_SHEEP, W5PNT5]	W5PNT5_SHEEP Uncharacterized protein OS=Ovis aries OX=9940 GN=PSMD6 PE=4 SV=1	W5PNT5_SHEEP	26.6359	27.0683	26.9084	23.2544	24.5868	24.4797	1.04284e+08	1.40723e+08	1.25957e+08	1.00061e+07	2.51978e+07	2.33946e+07	0.157963
W5PDS4	W5PDS4		C1QA	C1QA - Complement component 1, q subcomponent, A chain [a.k.a. Oar.2969, ENSOARP00000008588, XP_012008019.1, W5PDS4]	W5PDS4_SHEEP Uncharacterized protein OS=Ovis aries OX=9940 GN=C1QA PE=4 SV=1	W5PDS4_SHEEP	27.8709	28.1255	28.3767	25.4487	23.7202	26.6603	2.45459e+08	2.92832e+08	3.48523e+08	4.57966e+07	1.38193e+07	1.06061e+08	0.186823
W5PV56	W5PV56		CAPN5	CAPN5 - Calpain 5; Belongs to the peptidase C2 family [a.k.a. XM_004016345, W5PV56_SHEEP, ENSOART00000014547, W5PV56]	W5PV56_SHEEP Uncharacterized protein OS=Ovis aries OX=9940 GN=CAPN5 PE=3 SV=1	W5PV56_SHEEP	28.1619	29.3457	28.879	25.7078	24.5031	27.4818	3.00306e+08	6.82228e+08	4.93692e+08	5.48047e+07	2.37769e+07	1.87435e+08	0.1802
W5PJ14	W5PJ14		ESYT2	ESYT2 - Extended synaptotagmin-like protein 2 [a.k.a. oas:101118945, Extended synaptotagmin 2, ENSOARP00000010434, W5PJ14]	W5PJ14_SHEEP Uncharacterized protein OS=Ovis aries OX=9940 GN=ESYT2 PE=4 SV=1	W5PJ14_SHEEP	27.0373	27.4239	27.4792	24.0572	23.7188	25.9707	1.37737e+08	1.80057e+08	1.87096e+08	1.74561e+07	1.38059e+07	6.57577e+07	0.19216
W5PWG1	W5PWG1		PFKP	PFKP - 6-phosphofructokinase; Phosphofructokinase, platelet; Belongs to the phosphofructokinase type A (PFKA) family. ATP-dependent PFK group I subfamily. Eukaryotic two domain clade "E" sub-subfamily [a.k.a. PFKF, AMGL01025166, Phosphofructokinase, platelet, W5PWG1]	W5PWG1_SHEEP 6-phosphofructokinase OS=Ovis aries OX=9940 GN=PFKP PE=3 SV=1	W5PWG1_SHEEP	27.9818	27.427	28.2932	23.8548	25.7062	25.7782	2.65069e+08	1.80453e+08	3.28932e+08	1.5171e+07	5.47426e+07	5.75457e+07	0.16458
W5QD75	W5QD75		GNAI3	GNAI3 - G protein subunit alpha i3; Guanine nucleotide binding protein (G protein), alpha inhibiting activity polypeptide 3 [a.k.a. ENSOART00000020957, XM_004003597.1, W5QD75_SHEEP, W5QD75]	W5QD75_SHEEP Uncharacterized protein OS=Ovis aries OX=9940 GN=GNAI3 PE=4 SV=1	W5QD75_SHEEP	28.5002	28.1329	28.6229	22.9882	26.2371	27.9741	3.79668e+08	2.9433e+08	4.13391e+08	8.32009e+06	7.90973e+07	2.63654e+08	0.322857
W5PS39	W5PS39		KDELC2	KDELC2 - KDEL (Lys-Asp-Glu-Leu) containing 2 [a.k.a. ENSOARP00000013268, oas:101105356, W5PS39]	W5PS39_SHEEP Uncharacterized protein OS=Ovis aries OX=9940 GN=KDELC2 PE=4 SV=1	W5PS39_SHEEP	27.2323	26.8942	26.8958	24.8748	22.764	25.8142	1.57664e+08	1.24729e+08	1.24863e+08	3.07646e+07	7.12293e+06	5.9001e+07	0.237906
W5QCV4	W5QCV4		DHRS1	DHRS1 - Dehydrogenase/reductase (SDR family) member 1 [a.k.a. W5QCV4, EC 1.1.-.-, XP_004010348.1]	W5QCV4_SHEEP Uncharacterized protein OS=Ovis aries OX=9940 GN=DHRS1 PE=4 SV=1	W5QCV4_SHEEP	28.7814	28.9391	29.1052	25.2772	27.1019	26.7056	4.61398e+08	5.14668e+08	5.77495e+08	4.06622e+07	1.44038e+08	1.09442e+08	0.189334
W5QGI4	W5QGI4		FARSB	FARSB - phenylalanyl-tRNA synthetase, beta subunit [a.k.a. XP_004005011, FARSB-201, 101119961, W5QGI4]	W5QGI4_SHEEP Uncharacterized protein OS=Ovis aries OX=9940 GN=FARSB PE=4 SV=1	W5QGI4_SHEEP	27.6231	27.9336	27.7346	22.908	26.3065	26.6671	2.06714e+08	2.56365e+08	2.23331e+08	7.87045e+06	8.29963e+07	1.06559e+08	0.28762
W5Q2E1	W5Q2E1		LUM	LUM - Lumican [a.k.a. XP_004006300.1, XP_004006300, UPI00029D73C0, W5Q2E1]	W5Q2E1_SHEEP Uncharacterized protein OS=Ovis aries OX=9940 GN=LUM PE=4 SV=1;	W5Q2E1_SHEEP	32.8352	32.7096	32.9233	29.7429	29.7828	30.2715	7.66292e+09	7.02363e+09	8.14526e+09	8.98446e+08	9.23671e+08	1.29607e+09	0.136572
W5Q2E8	W5Q2E8		ENSOARG00000015730	ENSOARG00000015730 - Uncharacterized protein [a.k.a. LOC101118372, XM_004014092, XM_004014092.1, W5Q2E8]	W5Q2E8_SHEEP Uncharacterized protein OS=Ovis aries OX=9940 GN=LOC101118372 PE=4 SV=1	W5Q2E8_SHEEP	26.7312	26.6423	26.6823	24.0857	24.7022	24.2896	1.11398e+08	1.04748e+08	1.07691e+08	1.78035e+07	2.72964e+07	2.05068e+07	0.202592
W5Q9U3	W5Q9U3		CNP	CNP - 2',3'-cyclic nucleotide 3' phosphodiesterase [a.k.a. 2',3'-cyclic nucleotide 3' phosphodiesterase, oas:101120423, XM_004012913, W5Q9U3]	W5Q9U3_SHEEP Uncharacterized protein OS=Ovis aries OX=9940 GN=CNP PE=4 SV=1	W5Q9U3_SHEEP	28.0208	28.5032	27.6864	24.4334	26.1389	26.4732	2.72332e+08	3.80457e+08	2.15998e+08	2.26558e+07	7.38915e+07	9.31625e+07	0.218361
W5PK54	W5PK54		PIGU	PIGU - Phosphatidylinositol glycan anchor biosynthesis, class U [a.k.a. 101118548, W5PK54_SHEEP, bA346K17.2, W5PK54]	W5PK54_SHEEP Uncharacterized protein OS=Ovis aries OX=9940 GN=PIGU PE=4 SV=1	W5PK54_SHEEP	25.8117	25.7069	26.0149	22.8737	23.9538	24.1113	5.88959e+07	5.47707e+07	6.78051e+07	7.68559e+06	1.62481e+07	1.81232e+07	0.231755
W5PJ75	W5PJ75		SPTAN1	SPTAN1 - Spectrin, alpha, non-erythrocytic 1 [a.k.a. W5PJ75_SHEEP, XM_004007158, AMGL01074807, W5PJ75]	W5PJ75_SHEEP Uncharacterized protein OS=Ovis aries OX=9940 GN=SPTAN1 PE=4 SV=1	W5PJ75_SHEEP	30.8049	31.3814	31.1941	27.8786	28.878	28.7844	1.8759e+09	2.7974e+09	2.45677e+09	2.46774e+08	4.9334e+08	4.62332e+08	0.168645
W5NSP2	W5NSP2		RPS8	RPS8 - 40S ribosomal protein S8 ; Belongs to the eukaryotic ribosomal protein eS8 family [a.k.a. ENSOARP00000001182, W5NSP2, UPI0003CCFEB9]	W5NSP2_SHEEP 40S ribosomal protein S8 OS=Ovis aries OX=9940 GN=RPS8 PE=3 SV=1;tr	W5NSP2_SHEEP	26.7948	27.4781	27.3859	24.564	26.2257	24.0376	1.16422e+08	1.86947e+08	1.75376e+08	2.48032e+07	7.84711e+07	1.72197e+07	0.251687
W5PGK1	W5PGK1		CSRP3	CSRP3 - Cysteine and glycine-rich protein 3 (cardiac LIM protein) [a.k.a. UPI00029D5D83, W5PGK1_SHEEP, cysteine and glycine-rich protein 3, W5PGK1]	W5PGK1_SHEEP Cysteine and glycine-rich protein 3 OS=Ovis aries OX=9940 GN=CSRP3 PE=2 SV=1	W5PGK1_SHEEP	32.2137	30.7694	30.7958	28.3243	29.6754	27.9951	4.98061e+09	1.83028e+09	1.86409e+09	3.3609e+08	8.57397e+08	2.67523e+08	0.168416
W5Q7G2	W5Q7G2		GNAI1	GNAI1 - G protein subunit alpha i1; Guanine nucleotide binding protein (G protein), alpha inhibiting activity polypeptide 1 [a.k.a. UPI0000D4AEB3, Oar.22622, oas:101116393, W5Q7G2]	W5Q7G2_SHEEP Uncharacterized protein OS=Ovis aries OX=9940 GN=GNAI1 PE=4 SV=1	W5Q7G2_SHEEP	27.4432	26.5592	27.5716	24.6381	23.6965	26.4915	1.82486e+08	9.88822e+07	1.99473e+08	2.61097e+07	1.35941e+07	9.43491e+07	0.278788
W5PNN2	W5PNN2		HAPLN3	HAPLN3 - Hyaluronan and proteoglycan link protein 3 [a.k.a. ENSOARG00000011253, XP_004017791.1, ENSOART00000012234, W5PNN2]	W5PNN2_SHEEP Uncharacterized protein OS=Ovis aries OX=9940 GN=HAPLN3 PE=4 SV=1	W5PNN2_SHEEP	27.0633	26.297	27.4998	24.6925	24.8869	24.6439	1.40234e+08	8.24492e+07	1.89792e+08	2.71133e+07	3.10246e+07	2.6216e+07	0.204506
W5PUX9	W5PUX9		VLDLR	VLDLR - Very low density lipoprotein receptor [a.k.a. very low-density lipoprotein receptor isoform X1, CARMQ1, XP_004005354.1, W5PUX9]	W5PUX9_SHEEP Uncharacterized protein OS=Ovis aries OX=9940 GN=VLDLR PE=4 SV=1;tr	W5PUX9_SHEEP	26.8577	26.287	26.0262	23.8573	25.5313	23.3209	1.21614e+08	8.18817e+07	6.83374e+07	1.51967e+07	4.84953e+07	1.04785e+07	0.272853
W5Q1R1	W5Q1R1		VPS35	VPS35 - Vacuolar protein sorting-associated protein 35; Plays a role in vesicular protein sorting [a.k.a. AMGL01027567, MEM3, ENSOARG00000015518, W5Q1R1]	W5Q1R1_SHEEP Vacuolar protein sorting-associated protein 35 OS=Ovis aries OX=9940 GN=VPS35 PE=3 SV=1	W5Q1R1_SHEEP	27.4633	26.8218	27.378	23.2631	25.6431	26.5431	1.85043e+08	1.18622e+08	1.7442e+08	1.00665e+07	5.2401e+07	9.77876e+07	0.335202
W5PEC5	W5PEC5		ENSOARG00000008196	ENSOARG00000008196 - Dolichyl-diphosphooligosaccharide--protein glycosyltransferase subunit 1; Essential subunit of the N-oligosaccharyl transferase (OST) complex which catalyzes the transfer of a high mannose oligosaccharide from a lipid-linked oligosaccharide donor to an asparagine residue within an Asn-X-Ser/Thr consensus motif in nascent polypeptide chains; Belongs to the OST1 family [a.k.a. …	W5PEC5_SHEEP Dolichyl-diphosphooligosaccharide--protein glycosyltransferase subunit 1 OS=Ovis aries OX=9940 GN=LOC101123268 PE=3 SV=1	W5PEC5_SHEEP	28.6378	28.3903	28.9909	25.1859	26.4905	27.8501	4.17679e+08	3.51819e+08	5.33489e+08	3.81694e+07	9.42831e+07	2.41943e+08	0.287336
W5PEV6	W5PEV6		RPS19	RPS19 - Ribosomal protein S19 [a.k.a. RPS19-201, AMGL01029034, XM_004015294, W5PEV6]	W5PEV6_SHEEP Uncharacterized protein OS=Ovis aries OX=9940 GN=RPS19 PE=4 SV=1	W5PEV6_SHEEP	28.5231	28.1242	28.5872	25.3347	25.711	27.8039	3.85762e+08	2.92573e+08	4.03273e+08	4.23155e+07	5.49268e+07	2.3432e+08	0.306545
W5QB58	W5QB58		AASS	AASS - Aminoadipate-semialdehyde synthase [a.k.a. 101103973, XP_012032421.1, ENSOART00000020228, W5QB58]	W5QB58_SHEEP Uncharacterized protein OS=Ovis aries OX=9940 GN=AASS PE=4 SV=1	W5QB58_SHEEP	29.6356	29.5223	29.4158	25.9096	28.8125	27.2483	8.3409e+08	7.71103e+08	7.16197e+08	6.30324e+07	4.71453e+08	1.59428e+08	0.298922
W5NWM5	W5NWM5		DHRS7B	DHRS7B - Dehydrogenase/reductase (SDR family) member 7B; Belongs to the short-chain dehydrogenases/reductases (SDR) family [a.k.a. oas:101114453, Dehydrogenase/reductase (SDR family) member 7B, ENSOART00000002625, W5NWM5]	W5NWM5_SHEEP Uncharacterized protein OS=Ovis aries OX=9940 GN=DHRS7B PE=3 SV=1	W5NWM5_SHEEP	26.1994	26.5465	26.9574	24.147	25.0328	24.5888	7.70572e+07	9.80124e+07	1.30315e+08	1.8577e+07	3.4325e+07	2.52337e+07	0.25586
W5PPJ0	W5PPJ0		STT3A	STT3A - STT3A, subunit of the oligosaccharyltransferase complex (catalytic) [a.k.a. XP_004019565.1, ENSOARP00000012366, ENSOARG00000011533, W5PPJ0]	W5PPJ0_SHEEP Uncharacterized protein OS=Ovis aries OX=9940 GN=STT3A PE=4 SV=1	W5PPJ0_SHEEP	29.4106	29.247	29.8515	25.5127	27.4263	29.002	7.13634e+08	6.37141e+08	9.68719e+08	4.78738e+07	1.80358e+08	5.37618e+08	0.330179
W5PB83	W5PB83		SHMT2	SHMT2 - Serine hydroxymethyltransferase; Interconversion of serine and glycine; Belongs to the SHMT family [a.k.a. SHMT, AMGL01081558, EC 2.1.2.1, W5PB83]	W5PB83_SHEEP Serine hydroxymethyltransferase OS=Ovis aries OX=9940 GN=SHMT2 PE=3 SV=1	W5PB83_SHEEP	29.3136	29.5919	29.5526	27.1917	28.0698	26.6532	6.6721e+08	8.09171e+08	7.87424e+08	1.53295e+08	2.81739e+08	1.05542e+08	0.238791
W5Q2D9	W5Q2D9		RAB5A	RAB5A - Ovis aries RAB5A, member RAS oncogene family (RAB5A), mRNA [a.k.a. NM_001161881, ENSOARG00000015722, XP_011951664.1, W5Q2D9]	W5Q2D9_SHEEP Uncharacterized protein OS=Ovis aries OX=9940 GN=RAB5A PE=4 SV=1	W5Q2D9_SHEEP	26.9335	27.0467	27.2011	24.7519	25.0082	25.4505	1.28174e+08	1.3863e+08	1.54293e+08	2.82523e+07	3.3745e+07	4.58536e+07	0.256119
W5PKK8	W5PKK8		ESYT1	ESYT1 - Extended synaptotagmin 1 [a.k.a. ENSOARP00000010981, XM_004006594, UPI0003CCE171, W5PKK8]	W5PKK8_SHEEP Uncharacterized protein OS=Ovis aries OX=9940 GN=ESYT1 PE=4 SV=1	W5PKK8_SHEEP	29.7976	29.6118	30.048	26.36	27.6833	28.8735	9.33171e+08	8.20436e+08	1.11004e+09	8.61267e+07	2.15524e+08	4.9179e+08	0.277074
W5P4I6	W5P4I6		MATN4	MATN4 - Matrilin 4 [a.k.a. XM_004014853, AMGL01026209, ENSOART00000005426, W5P4I6]	W5P4I6_SHEEP Uncharacterized protein OS=Ovis aries OX=9940 GN=MATN4 PE=4 SV=1	W5P4I6_SHEEP	30.3614	29.4208	30.2191	28.1721	27.3448	27.9192	1.37945e+09	7.18669e+08	1.24982e+09	3.02448e+08	1.70451e+08	2.5381e+08	0.217061
W5P2A5	W5P2A5		ILVBL	ILVBL - ilvB (bacterial acetolactate synthase)-like; Belongs to the TPP enzyme family [a.k.a. XP_004008513.1, ENSOART00000004635, AMGL01091012, W5P2A5]	W5P2A5_SHEEP Uncharacterized protein OS=Ovis aries OX=9940 GN=ILVBL PE=3 SV=1	W5P2A5_SHEEP	29.9927	29.9681	30.3155	27.2693	28.5261	27.8964	1.0683e+09	1.05023e+09	1.33618e+09	1.61766e+08	3.86548e+08	2.49826e+08	0.231029
W5NYQ9	W5NYQ9		TIMM44	TIMM44 - Mitochondrial import inner membrane translocase subunit TIM44; Essential component of the PAM complex, a complex required for the translocation of transit peptide-containing proteins from the inner membrane into the mitochondrial matrix in an ATP-dependent manner [a.k.a. XM_004023662.1, TIMM44-201, ENSOARP00000003307, W5NYQ9]	W5NYQ9_SHEEP Mitochondrial import inner membrane translocase subunit TIM44 OS=Ovis aries OX=9940 GN=TIMM44 PE=3 SV=1	W5NYQ9_SHEEP	28.1904	27.9922	27.7371	23.8921	27.1494	26.7899	3.06301e+08	2.66985e+08	2.23719e+08	1.55678e+07	1.48861e+08	1.16029e+08	0.35189
W5PQK3	W5PQK3		PFKL	PFKL - ATP-dependent 6-phosphofructokinase; Catalyzes the phosphorylation of D-fructose 6-phosphate to fructose 1,6-bisphosphate by ATP, the first committing step of glycolysis [a.k.a. PFK-L, XP_004003967, PFKL-201, W5PQK3]	W5PQK3_SHEEP ATP-dependent 6-phosphofructokinase OS=Ovis aries OX=9940 GN=PFKL PE=3 SV=1	W5PQK3_SHEEP	27.3093	26.8509	26.7868	23.1762	25.3679	26.6413	1.66315e+08	1.21043e+08	1.15779e+08	9.47858e+06	4.33014e+07	1.04671e+08	0.390565
W5P4C0	W5P4C0		RPS13	RPS13 - Ribosomal protein S13; Belongs to the universal ribosomal protein uS15 family [a.k.a. ribosomal protein S13, S13, W5P4C0]	W5P4C0_SHEEP Uncharacterized protein OS=Ovis aries OX=9940 GN=RPS13 PE=3 SV=1;tr	W5P4C0_SHEEP	26.2142	26.3985	26.3063	23.8139	24.5521	24.9644	7.7853e+07	8.84609e+07	8.29807e+07	1.47471e+07	2.45992e+07	3.27363e+07	0.289146
W5Q9M9	W5Q9M9		GK	GK - Uncharacterized protein; Belongs to the FGGY kinase family [a.k.a. 2.7.1.30, ENSOART00000019691, UPI0003CCE587, W5Q9M9]	W5Q9M9_SHEEP Uncharacterized protein OS=Ovis aries OX=9940 GN=GK PE=3 SV=1;tr	W5Q9M9_SHEEP	26.7135	27.0252	26.8234	25.3492	25.4198	24.1727	1.10041e+08	1.3658e+08	1.18754e+08	4.27429e+07	4.48857e+07	1.89105e+07	0.291588
W5QAQ0	W5QAQ0	no known family	MAGT1	MAGT1 - Magnesium transporter 1 [a.k.a. ENSOARG00000018438, OST3B, AMGL01116113, W5QAQ0]	W5QAQ0_SHEEP Isoform of W5QAP9, Uncharacterized protein OS=Ovis aries OX=9940 GN=MAGT1 PE=4 SV=1;tr	W5QAQ0_SHEEP	27.009	26.9426	27.2694	23.409	25.9689	26.184	1.35061e+08	1.28984e+08	1.61775e+08	1.11381e+07	6.56783e+07	7.62352e+07	0.359428
W5PRR0	W5PRR0		FMO3	FMO3 - Flavin containing monooxygenase 3 [a.k.a. W5PRR0, 101104165, UPI00029D6068]	W5PRR0_SHEEP Dimethylaniline monooxygenase [N-oxide-forming] OS=Ovis aries OX=9940 GN=FMO3 PE=3 SV=1	W5PRR0_SHEEP	28.5439	28.7151	28.8855	25.7522	27.2182	27.2551	3.9135e+08	4.4066e+08	4.95921e+08	5.65171e+07	1.56137e+08	1.60175e+08	0.280759
W5PWH8	W5PWH8	no known family	unknown	unknown	W5PWH8_SHEEP Isoform of W5PWI3, Uncharacterized protein OS=Ovis aries OX=9940 GN=GLS PE=3 SV=1	W5PWH8_SHEEP	28.8625	28.336	28.6117	23.8472	28.2388	27.903	4.88064e+08	3.3884e+08	4.10198e+08	1.50911e+07	3.16762e+08	2.50988e+08	0.471135
W5Q337	W5Q337		GLRX5	GLRX5 - Glutaredoxin 5 [a.k.a. 101120526, GRX5, ENSOARP00000017125, W5Q337]	W5Q337_SHEEP Uncharacterized protein OS=Ovis aries OX=9940 GN=GLRX5 PE=4 SV=1	W5Q337_SHEEP	26.6667	26.1712	26.8205	24.3554	25.574	24.3368	1.06533e+08	7.55617e+07	1.18516e+08	2.14632e+07	4.99505e+07	2.11894e+07	0.308051
W5NT24	W5NT24		TNXB	TNXB - Uncharacterized protein; Tenascin XB [a.k.a. XB, W5NT24_SHEEP, ENSOART00000001354, W5NT24]	W5NT24_SHEEP Uncharacterized protein OS=Ovis aries OX=9940 GN=TNXB PE=4 SV=1	W5NT24_SHEEP	30.6002	30.3226	30.579	28.5733	27.0702	29.7106	1.62777e+09	1.3428e+09	1.60402e+09	3.99402e+08	1.40914e+08	8.78568e+08	0.310166
W5Q5F5	W5Q5F5	no known family	ACOT9	ACOT9 - acyl-CoA thioesterase 9 [a.k.a. ENSOARP00000017947, AMGL01114198, MT-ACT48, W5Q5F5]	W5Q5F5_SHEEP Isoform of W5Q5F7, Uncharacterized protein OS=Ovis aries OX=9940 GN=ACOT9 PE=4 SV=1;tr	W5Q5F5_SHEEP	29.1548	29.3539	29.1792	25.2184	28.9122	27.6794	5.97688e+08	6.86113e+08	6.07879e+08	3.90381e+07	5.05164e+08	2.14943e+08	0.401307
W5QB02	W5QB02		TGM2	TGM2 - Transglutaminase 2 [a.k.a. transglutaminase 2, TGC, oas:101123140, W5QB02]	W5QB02_SHEEP Uncharacterized protein OS=Ovis aries OX=9940 GN=TGM2 PE=4 SV=1	W5QB02_SHEEP	28.1124	28.61	28.7097	26.2557	25.9534	27.5525	2.90188e+08	4.09705e+08	4.3902e+08	8.01221e+07	6.49753e+07	1.96853e+08	0.300242
W5PXC6	W5PXC6		ENSOARG00000014069	ENSOARG00000014069 - Uncharacterized protein [a.k.a. ENSOART00000015330, W5PXC6, ENSOARP00000015110]	W5PXC6_SHEEP Uncharacterized protein OS=Ovis aries OX=9940 PE=3 SV=1	W5PXC6_SHEEP	28.443	28.2511	28.5179	26.9017	27.3902	25.2645	3.64923e+08	3.1947e+08	3.84359e+08	1.25378e+08	1.759e+08	4.03052e+07	0.319609
W5PU75	W5PU75		GNA11	GNA11 - G protein subunit alpha 11; Guanine nucleotide binding protein (G protein), alpha 11 (Gq class) [a.k.a. XP_004009420, W5PU75, FBH2]	W5PU75_SHEEP Uncharacterized protein OS=Ovis aries OX=9940 GN=GNA11 PE=4 SV=1	W5PU75_SHEEP	27.7267	28.0877	27.5605	24.1404	26.6897	27.0992	2.22103e+08	2.85252e+08	1.97941e+08	1.84922e+07	1.08246e+08	1.43776e+08	0.383548
W5NV70	W5NV70		MFAP5	MFAP5 - Microfibrillar associated protein 5 [a.k.a. XP_014950447.1, XP_004006943, oas:101102052, W5NV70]	W5NV70_SHEEP Uncharacterized protein OS=Ovis aries OX=9940 GN=MFAP5 PE=4 SV=1	W5NV70_SHEEP	28.5156	27.9554	28.8965	26.6327	25.8426	27.4068	3.83741e+08	2.60267e+08	4.99701e+08	1.0405e+08	6.01729e+07	1.77933e+08	0.299164
W5Q537	W5Q537		ASPH	ASPH - Aspartate beta-hydroxylase [a.k.a. BAH, ASPH-201, UPI0003CCDF8D, W5Q537]	W5Q537_SHEEP Aspartate beta-hydroxylase OS=Ovis aries OX=9940 GN=ASPH PE=4 SV=1	W5Q537_SHEEP	30.5069	30.284	30.379	26.6914	29.2043	29.4979	1.52581e+09	1.30732e+09	1.39638e+09	1.08372e+08	6.18532e+08	7.58151e+08	0.351118
W5QGX9	W5QGX9		SEC22B	SEC22B - SEC22 vesicle trafficking protein homolog B (S. cerevisiae) (gene/pseudogene); Belongs to the synaptobrevin family [a.k.a. LOC101112362, ENSOARP00000021978, SEC22L1, W5QGX9]	W5QGX9_SHEEP Uncharacterized protein OS=Ovis aries OX=9940 GN=SEC22B PE=3 SV=1	W5QGX9_SHEEP	29.098	28.6662	29.4468	25.808	27.7544	28.1393	5.7461e+08	4.25966e+08	7.31757e+08	5.87479e+07	2.26415e+08	2.95653e+08	0.33528
W5Q0C6	W5Q0C6		APP	APP - Amyloid-beta A4 protein; Functional neuronal receptor which couples to intracellular signaling pathway through the GTP-binding protein G(O) [a.k.a. XP_004002851.1, XP_004002851, X56130, W5Q0C6]	W5Q0C6_SHEEP Amyloid-beta A4 protein OS=Ovis aries OX=9940 GN=APP PE=4 SV=1	W5Q0C6_SHEEP	25.2561	25.4377	25.7149	23.976	23.7863	23.8564	4.00724e+07	4.54474e+07	5.50751e+07	1.65005e+07	1.44679e+07	1.51877e+07	0.328291
W5QFP2	W5QFP2		HIST1H1D	HIST1H1D - Histone cluster 1, H1d [a.k.a. LOC101109397, W5QFP2, W5QFP2_SHEEP]	W5QFP2_SHEEP Uncharacterized protein OS=Ovis aries OX=9940 GN=HIST1H1D PE=3 SV=1	W5QFP2_SHEEP	29.3097	28.9695	29.4477	27.7198	26.1752	28.3954	6.65417e+08	5.25641e+08	7.32215e+08	2.21046e+08	7.57724e+07	3.53087e+08	0.337916
P50751	P50751		unknown	unknown	TNNT2_SHEEP Troponin T, cardiac muscle OS=Ovis aries OX=9940 GN=TNNT2 PE=2 SV=2	TNNT2_SHEEP	28.988	29.8954	29.6658	26.7753	28.5547	27.7452	5.32407e+08	9.98641e+08	8.51715e+08	1.14863e+08	3.94286e+08	2.24984e+08	0.308102
W5PUV3	W5PUV3		NT5E	NT5E - 5'-nucleotidase, ecto (CD73); Belongs to the 5'-nucleotidase family [a.k.a. AMGL01107468, XP_004011351.1, NT5E-201, W5PUV3]	W5PUV3_SHEEP Uncharacterized protein OS=Ovis aries OX=9940 GN=NT5E PE=3 SV=1	W5PUV3_SHEEP	30.2288	30.0375	30.288	28.4281	27.4042	29.1548	1.25826e+09	1.10199e+09	1.31101e+09	3.61165e+08	1.77615e+08	5.97675e+08	0.309554
W5PF02	W5PF02		SRPRB	SRPRB - Signal recognition particle receptor, B subunit [a.k.a. ENSOART00000009148, APMCF1, XM_004003329.1, W5PF02]	W5PF02_SHEEP SRP receptor subunit beta OS=Ovis aries OX=9940 GN=SRPRB PE=4 SV=1	W5PF02_SHEEP	27.4378	26.8624	27.3546	25.4135	25.5652	25.6605	1.81803e+08	1.22007e+08	1.71615e+08	4.46909e+07	4.96486e+07	5.30387e+07	0.309993
W5Q9W3	W5Q9W3		ABCB7	ABCB7 - ATP-binding cassette, sub-family B (MDR/TAP), member 7 [a.k.a. AMGL01116051, AMGL01116046, AMGL01116049, W5Q9W3]	W5Q9W3_SHEEP Uncharacterized protein OS=Ovis aries OX=9940 GN=ABCB7 PE=4 SV=1	W5Q9W3_SHEEP	26.1351	26.7656	26.9126	23.1046	25.7176	26.1322	7.36951e+07	1.14092e+08	1.26326e+08	9.01921e+06	5.51803e+07	7.35497e+07	0.438534
W5Q2T7	W5Q2T7		ENSOARG00000015855	ENSOARG00000015855 - Uncharacterized protein [a.k.a. W5Q2T7, W5Q2T7_SHEEP, ENSOARP00000017025]	W5Q2T7_SHEEP Uncharacterized protein OS=Ovis aries OX=9940 GN=DEGS1 PE=3 SV=1	W5Q2T7_SHEEP	26.3172	26.4143	26.6997	24.1478	24.4329	26.0301	8.36122e+07	8.94341e+07	1.08994e+08	1.85874e+07	2.26482e+07	6.85242e+07	0.389164
W5PWQ4	W5PWQ4		EPB41L2	EPB41L2 - Erythrocyte membrane protein band 4.1-like 2 [a.k.a. 101120756, W5PWQ4_SHEEP, XP_014952896.1, W5PWQ4]	W5PWQ4_SHEEP Uncharacterized protein OS=Ovis aries OX=9940 GN=EPB41L2 PE=4 SV=1;tr	W5PWQ4_SHEEP	28.7155	28.2637	29.2021	26.1566	27.172	27.638	4.40777e+08	3.22261e+08	6.17619e+08	7.48057e+07	1.51209e+08	2.08865e+08	0.31498
W5PI17	W5PI17		ENSOARG00000009395	ENSOARG00000009395 - Uncharacterized protein [a.k.a. LOC101105609, ENSOARP00000010085, W5PI17_SHEEP, W5PI17]	W5PI17_SHEEP Uncharacterized protein OS=Ovis aries OX=9940 PE=3 SV=1;tr	W5PI17_SHEEP	28.3939	28.0298	28.5147	25.9031	26.8076	27.1458	3.52715e+08	2.7403e+08	3.83504e+08	6.27516e+07	1.17461e+08	1.48496e+08	0.325373
W5NZ80	W5NZ80		FAM129A	FAM129A - Family with sequence similarity 129, member A [a.k.a. XP_004014154, Oar.14984, NIBAN, W5NZ80]	W5NZ80_SHEEP Uncharacterized protein OS=Ovis aries OX=9940 GN=FAM129A PE=4 SV=1	W5NZ80_SHEEP	28.8166	28.845	28.5932	26.4217	27.4727	27.2129	4.72784e+08	4.82164e+08	4.04964e+08	8.98933e+07	1.86255e+08	1.55559e+08	0.317453
W5Q8J9	W5Q8J9		ENSOARG00000017744	ENSOARG00000017744 - 40S ribosomal protein S4; Belongs to the eukaryotic ribosomal protein eS4 family [a.k.a. LOC101109246, 40S ribosomal protein S4, W5Q8J9_SHEEP, W5Q8J9]	W5Q8J9_SHEEP 40S ribosomal protein S4 OS=Ovis aries OX=9940 GN=RPS4X PE=3 SV=1;tr	W5Q8J9_SHEEP	26.9717	26.6948	27.3963	23.7506	26.1141	26.3663	1.31613e+08	1.08623e+08	1.76649e+08	1.41133e+07	7.26301e+07	8.65052e+07	0.415579
W5QG71	W5QG71		ENSOARG00000020228	ENSOARG00000020228 - Uncharacterized protein; Belongs to the universal ribosomal protein uL14 family [a.k.a. UPI0003CD0DAF, W5QG71_SHEEP, W5QG71]	W5QG71_SHEEP Uncharacterized protein OS=Ovis aries OX=9940 PE=3 SV=1;tr	W5QG71_SHEEP	26.0287	25.8095	26.5027	24.1005	24.7828	24.8324	6.84591e+07	5.88075e+07	9.5083e+07	1.79877e+07	2.88649e+07	2.98744e+07	0.345074
W5PGR8	W5PGR8		EPDR1	EPDR1 - Uncharacterized protein; Ependymin related 1 [a.k.a. oas:101107276, Ependymin related 1, EPDR, W5PGR8]	W5PGR8_SHEEP Uncharacterized protein OS=Ovis aries OX=9940 PE=4 SV=1	W5PGR8_SHEEP	27.1452	26.4058	27.3862	25.1442	25.1277	25.8894	1.48429e+08	8.89088e+07	1.75415e+08	3.70811e+07	3.66606e+07	6.21584e+07	0.329253
W5Q8S1	W5Q8S1		2020-09-02	SEPT2 - Uncharacterized protein; Septin 2; Belongs to the TRAFAC class TrmE-Era-EngA-EngB-Septin- like GTPase superfamily. Septin GTPase family [a.k.a. UPI0003CCDDC4, ENSOARG00000017810, septin-2 isoform X1, W5Q8S1]	W5Q8S1_SHEEP Uncharacterized protein OS=Ovis aries OX=9940 GN=SEPT2 PE=3 SV=1	W5Q8S1_SHEEP	27.2918	27.5736	27.0554	25.1171	26.5615	25.4456	1.64303e+08	1.99745e+08	1.39469e+08	3.63924e+07	9.90394e+07	4.56959e+07	0.359725
W5QCG3	W5QCG3		CLCC1	CLCC1 - Chloride channel CLIC-like 1 [a.k.a. UPI00029D4781, W5QCG3, XP_012033019.1]	W5QCG3_SHEEP Uncharacterized protein OS=Ovis aries OX=9940 GN=CLCC1 PE=4 SV=1	W5QCG3_SHEEP	27.1035	27.5347	27.5109	25.6862	25.8092	25.898	1.44197e+08	1.94432e+08	1.91254e+08	5.39909e+07	5.87944e+07	6.25287e+07	0.330854
W5P0T6	W5P0T6		FOLH1	FOLH1 - Folate hydrolase (prostate-specific membrane antigen) 1 [a.k.a. LOC101121723, FOLH1B, W5P0T6_SHEEP, W5P0T6]	W5P0T6_SHEEP Uncharacterized protein OS=Ovis aries OX=9940 GN=FOLH1 PE=4 SV=1	W5P0T6_SHEEP	26.9922	27.6869	27.4006	26.2211	24.4735	26.647	1.33496e+08	2.16067e+08	1.77176e+08	7.82249e+07	2.32946e+07	1.05086e+08	0.392235
W5NTE7	W5NTE7		ENSOARG00000020156	ENSOARG00000020156 - Uncharacterized protein [a.k.a. RPL9, LOC101120489, LOC101107098, W5NTE7]	W5NTE7_SHEEP Uncharacterized protein OS=Ovis aries OX=9940 GN=LOC101120489 PE=4 SV=1;tr	W5NTE7_SHEEP	27.8201	27.3409	27.2161	25.3365	25.1855	27.1408	2.36967e+08	1.69989e+08	1.55905e+08	4.23683e+07	3.81591e+07	1.47977e+08	0.40597
W5PBP1	W5PBP1		RPS14	RPS14 - Ribosomal protein S14; Belongs to the universal ribosomal protein uS11 family [a.k.a. XM_004008974, XP_004009023, XP_004009023.1, W5PBP1]	W5PBP1_SHEEP Uncharacterized protein OS=Ovis aries OX=9940 GN=RPS14 PE=3 SV=1	W5PBP1_SHEEP	27.0116	27.2179	27.5376	25.6969	25.9069	25.5479	1.35299e+08	1.56096e+08	1.94826e+08	5.43926e+07	6.29148e+07	4.90546e+07	0.342153
W5PKS6	W5PKS6		DEK	DEK - DEK proto-oncogene [a.k.a. ENSOARP00000011051, DEK-201, W5PKS6]	W5PKS6_SHEEP Uncharacterized protein OS=Ovis aries OX=9940 GN=DEK PE=4 SV=1;tr	W5PKS6_SHEEP	27.4707	27.3757	27.2346	24.8566	25.6747	26.9415	1.85994e+08	1.74149e+08	1.57915e+08	3.03796e+07	5.35603e+07	1.28881e+08	0.410805
W5Q7T0	W5Q7T0		ENSOARG00000017492	ENSOARG00000017492 - Uncharacterized protein [a.k.a. LOC101117657, XM_004006354, ENSOART00000019038, W5Q7T0]	W5Q7T0_SHEEP Uncharacterized protein OS=Ovis aries OX=9940 GN=LOC101117657 PE=4 SV=1;tr	W5Q7T0_SHEEP	28.9774	28.9229	29.0819	26.3013	27.4549	28.3457	5.28533e+08	5.08941e+08	5.68241e+08	8.26935e+07	1.83967e+08	3.41127e+08	0.378515
W5P5A0	W5P5A0		FLNA	FLNA - Filamin A, alpha [a.k.a. ENSOARP00000005603, OPD2, ENSOART00000005691, W5P5A0]	W5P5A0_SHEEP Uncharacterized protein OS=Ovis aries OX=9940 GN=FLNA PE=4 SV=1	W5P5A0_SHEEP	30.5878	31.179	31.047	28.3824	29.7053	29.5422	1.6138e+09	2.4311e+09	2.21858e+09	3.49906e+08	8.75364e+08	7.81812e+08	0.320442
W5NUL7	W5NUL7		AFG3L2	AFG3L2 - AFG3-like AAA ATPase 2 [a.k.a. SPAX5, 3.4.24.-, XP_004020561, W5NUL7]	W5NUL7_SHEEP Uncharacterized protein OS=Ovis aries OX=9940 GN=AFG3L2 PE=3 SV=1	W5NUL7_SHEEP	29.3585	28.9552	29.078	26.7101	28.5729	27.3168	6.88297e+08	5.20474e+08	5.66679e+08	1.09783e+08	3.99303e+08	1.67177e+08	0.380897
Q2TCH3	Q2TCH3		ACLY	ACLY - ATP-citrate synthase; ATP-citrate synthase is the primary enzyme responsible for the synthesis of cytosolic acetyl-CoA in many tissues. Has a central role in de novo lipid synthesis. In nervous tissue it may be involved in the biosynthesis of acetylcholine (By similarity); In the C-terminal section; belongs to the succinate/malate CoA ligase alpha subunit family [a.k.a. W5Q8U8, UPI0003CD04…	ACLY_SHEEP ATP-citrate synthase OS=Ovis aries OX=9940 GN=ACLY PE=2 SV=1;tr	ACLY_SHEEP	26.2696	26.4956	26.9569	23.9838	25.9103	25.496	8.0897e+07	9.4619e+07	1.30266e+08	1.65894e+07	6.30617e+07	4.73213e+07	0.415239
Q9XSM2	Q9XSM2		TRYPTASE	TRYPTASE-1 - Tryptase-2; Tryptase is the major neutral protease present in mast cells and is secreted upon the coupled activation-degranulation response of this cell type; Belongs to the peptidase S1 family. Tryptase subfamily [a.k.a. TPSB2, UPI0003CCF914, AMGL01067836, Q9XSM2]	TRYT_SHEEP Tryptase-2 OS=Ovis aries OX=9940 PE=2 SV=1	TRYT_SHEEP	30.3836	29.9985	30.8934	28.5256	28.4365	29.3599	1.40075e+09	1.07262e+09	1.99452e+09	3.86413e+08	3.63288e+08	6.88976e+08	0.322003
W5PP64	W5PP64	no known family	FHL1	FHL1 - Uncharacterized protein; Ovis aries four and a half LIM domains 1 (FHL1), mRNA [a.k.a. XP_014960149.1, W5PP66, ENSOARG00000011424, W5PP64]	W5PP64_SHEEP Isoform of W5PP66, Uncharacterized protein OS=Ovis aries OX=9940 GN=FHL1 PE=4 SV=1;tr	W5PP64_SHEEP	32.0144	31.4064	31.6264	29.2828	29.9839	30.6258	4.33802e+09	2.84615e+09	3.31499e+09	6.53132e+08	1.06181e+09	1.65683e+09	0.321147
W5PP28	W5PP28		EHD2	EHD2 - EH-domain containing 2; Belongs to the TRAFAC class dynamin-like GTPase superfamily. Dynamin/Fzo/YdjA family [a.k.a. PAST2, EH domain containing 2, AMGL01029261, W5PP28]	W5PP28_SHEEP Uncharacterized protein OS=Ovis aries OX=9940 GN=EHD2 PE=3 SV=1	W5PP28_SHEEP	30.6572	30.2728	30.2694	26.534	29.9245	29.8248	1.69327e+09	1.29724e+09	1.2942e+09	9.71696e+07	1.01902e+09	9.50969e+08	0.48245
W5NR63	W5NR63		S100A4	S100A4 - S100 calcium binding protein A4; Belongs to the S-100 family [a.k.a. UPI0003CCF621, FSP1, 18A2, W5NR63]	W5NR63_SHEEP Protein S100 OS=Ovis aries OX=9940 GN=S100A4 PE=3 SV=1	W5NR63_SHEEP	30.3273	29.7628	30.125	28.2778	27.3906	29.7154	1.34714e+09	9.10965e+08	1.17093e+09	3.25437e+08	1.75952e+08	8.81503e+08	0.403289
W5PKD3	W5PKD3		GNAI2	GNAI2 - G protein subunit alpha i2; Ovis aries guanine nucleotide binding protein (G protein), alpha inhibiting activity polypeptide 2 (GNAI2), mRNA [a.k.a. W5PKD3_SHEEP, NM_001162566, GNAI2-201, W5PKD3]	W5PKD3_SHEEP Uncharacterized protein OS=Ovis aries OX=9940 GN=GNAI2 PE=4 SV=1	W5PKD3_SHEEP	32.3706	32.0472	32.404	29.1666	30.8024	31.7017	5.55287e+09	4.43787e+09	5.68281e+09	6.02608e+08	1.87254e+09	3.4927e+09	0.380759
W5PEP0	W5PEP0		PARVA	PARVA - Parvin, alpha [a.k.a. ENSOARP00000008904, XM_004016144, Parvin, alpha, W5PEP0]	W5PEP0_SHEEP Uncharacterized protein OS=Ovis aries OX=9940 GN=PARVA PE=4 SV=1	W5PEP0_SHEEP	28.0957	28.3386	27.9693	26.3957	26.9512	26.5852	2.86849e+08	3.39443e+08	2.6278e+08	8.8288e+07	1.29754e+08	1.00683e+08	0.358491
W5PWM2	W5PWM2		TMEM33	TMEM33 - Transmembrane protein 33 [a.k.a. ENSOART00000015075, oas:101118275, W5PWM2]	W5PWM2_SHEEP Uncharacterized protein OS=Ovis aries OX=9940 GN=TMEM33 PE=4 SV=1	W5PWM2_SHEEP	27.5753	27.8002	28.278	27.2186	25.1612	26.8797	1.99976e+08	2.33714e+08	3.2548e+08	1.56172e+08	3.75201e+07	1.23477e+08	0.417784
CON__ENSEMBL:ENSBTAP0014147	CON__ENSEMBL:ENSBTAP0014147	no known family	unknown	unknown	CON__ENSEMBL:ENSBTAP00000014147	CON__ENSEMBL:ENSBTAP0014147	27.6224	26.9749	27.6848	24.2803	26.8974	26.7934	2.06615e+08	1.31903e+08	2.1575e+08	2.03749e+07	1.25005e+08	1.16309e+08	0.472135
W5PH02	W5PH02		ENSOARG00000009057	ENSOARG00000009057 - Uncharacterized protein [a.k.a. LOC101116750, XP_004014021.1, AMGL01020125, W5PH02]	W5PH02_SHEEP Uncharacterized protein OS=Ovis aries OX=9940 PE=4 SV=1	W5PH02_SHEEP	26.66	26.6778	26.9871	25.4765	24.9691	25.6818	1.06037e+08	1.07357e+08	1.33021e+08	4.66862e+07	3.28444e+07	5.3827e+07	0.384964
W5Q501	W5Q501		GNAS	GNAS - GNAS complex locus [a.k.a. LOC101115640, AMGL01025700, AMGL01025696, W5Q501]	W5Q501_SHEEP Uncharacterized protein OS=Ovis aries OX=9940 GN=GNAS PE=4 SV=1	W5Q501_SHEEP	29.8918	29.8083	29.9303	27.1604	28.9322	28.861	9.96164e+08	9.40161e+08	1.02308e+09	1.50001e+08	5.12239e+08	4.87548e+08	0.38852
W5PP34	W5PP34		RHOT1	RHOT1 - Mitochondrial Rho GTPase; Mitochondrial GTPase involved in mitochondrial trafficking [a.k.a. ENSOARG00000011384, RHOT1-202, ARHT1, W5PP34]	W5PP34_SHEEP Mitochondrial Rho GTPase OS=Ovis aries OX=9940 GN=RHOT1 PE=3 SV=1;tr	W5PP34_SHEEP	27.6759	28.0028	27.9918	25.8888	27.5983	25.8252	2.14423e+08	2.68957e+08	2.66919e+08	6.21296e+07	2.032e+08	5.94522e+07	0.43287
W5PYQ9	W5PYQ9	no known family	CPNE1	CPNE1 - Uncharacterized protein; Copine-1 [a.k.a. RBM12, ENSOARG00000014537, Copine-1, W5PYQ9]	W5PYQ9_SHEEP Isoform of W5PYR3, Uncharacterized protein OS=Ovis aries OX=9940 GN=CPNE1 PE=4 SV=1	W5PYQ9_SHEEP	29.6122	29.4812	29.8097	28.2803	27.0439	28.9703	8.20673e+08	7.49407e+08	9.41039e+08	3.26e+08	1.38364e+08	5.25948e+08	0.394371
W5NTS5	W5NTS5		ADCK3	ADCK3 - Coenzyme Q8A; aarF domain containing kinase 3 [a.k.a. COQ8A, W5NTS5_SHEEP, COQ8, W5NTS5]	W5NTS5_SHEEP Uncharacterized protein OS=Ovis aries OX=9940 GN=COQ8A PE=4 SV=1	W5NTS5_SHEEP	29.6013	28.8095	28.9218	27.3848	28.7299	26.7467	8.1447e+08	4.70476e+08	5.08556e+08	1.75242e+08	4.45204e+08	1.12606e+08	0.408726
W5QB08	W5QB08		GNAO1	GNAO1 - G protein subunit alpha o1; Guanine nucleotide binding protein (G protein), alpha activating activity polypeptide O [a.k.a. XM_004015006, XP_004015055.1, AMGL01027873, W5QB08]	W5QB08_SHEEP Uncharacterized protein OS=Ovis aries OX=9940 GN=GNAO1 PE=4 SV=1	W5QB08_SHEEP	28.8638	27.7176	28.4204	26.5091	27.6365	26.526	4.88509e+08	2.20709e+08	3.59248e+08	9.55086e+07	2.08642e+08	9.66322e+07	0.375101
W5NUQ4	W5NUQ4		TNNI3	TNNI3 - Troponin I type 3 (cardiac) [a.k.a. ENSOART00000001945, CMD2A, UPI00029D54DA, W5NUQ4]	W5NUQ4_SHEEP Cardiac troponin I OS=Ovis aries OX=9940 GN=TNNI3 PE=2 SV=1	W5NUQ4_SHEEP	29.5507	30.2227	29.5517	27.9086	29.2278	27.6745	7.86417e+08	1.25297e+09	7.86965e+08	2.51959e+08	6.28701e+08	2.14217e+08	0.387381
W5PQK6	W5PQK6		TLN1	TLN1 - Talin 1 [a.k.a. LOW QUALITY PROTEIN: talin-1 isoform X1, ENSOARG00000011863, oas:101114674, W5PQK6]	W5PQK6_SHEEP Uncharacterized protein OS=Ovis aries OX=9940 GN=TLN1 PE=4 SV=1	W5PQK6_SHEEP	29.1696	29.0372	28.9847	26.6513	28.2464	28.0244	6.03842e+08	5.50885e+08	5.31201e+08	1.05398e+08	3.18439e+08	2.7302e+08	0.413337
W5PHI8	W5PHI8		DPT	DPT - Dermatopontin [a.k.a. DPT-201, oas:101122371, W5PHI8]	W5PHI8_SHEEP Uncharacterized protein OS=Ovis aries OX=9940 GN=DPT PE=4 SV=1	W5PHI8_SHEEP	27.8259	27.6449	28.0204	26.6202	25.166	27.6305	2.37918e+08	2.09874e+08	2.72252e+08	1.03153e+08	3.76461e+07	2.07776e+08	0.484103
W5NXC0	W5NXC0		ACAD9	ACAD9 - acyl-CoA dehydrogenase family, member 9 [a.k.a. LOC101111495, UPI0003CD09DC, acyl-CoA dehydrogenase family, member 9, W5NXC0]	W5NXC0_SHEEP Uncharacterized protein OS=Ovis aries OX=9940 GN=ACAD9 PE=3 SV=1	W5NXC0_SHEEP	26.1114	26.1807	26.1097	25.2369	25.1997	24.1448	7.24951e+07	7.60612e+07	7.24126e+07	3.9542e+07	3.8537e+07	1.85485e+07	0.43729
W5Q2C8	W5Q2C8		KERA	KERA - Keratocan [a.k.a. oas:101112715, keratocan, UPI0003CCF3DB, W5Q2C8]	W5Q2C8_SHEEP Uncharacterized protein OS=Ovis aries OX=9940 GN=KERA PE=4 SV=1	W5Q2C8_SHEEP	29.5484	28.93	29.5696	28.4287	26.7258	28.6179	7.85178e+08	5.11447e+08	7.96777e+08	3.61325e+08	1.10982e+08	4.11942e+08	0.422398
W5PS52	W5PS52		MRC2	MRC2 - Mannose receptor, C type 2 [a.k.a. mannose receptor, C type 2, XP_014953855, AMGL01018892, W5PS52]	W5PS52_SHEEP Uncharacterized protein OS=Ovis aries OX=9940 GN=MRC2 PE=4 SV=1	W5PS52_SHEEP	29.7271	29.0968	29.5682	28.7014	27.2153	28.1915	8.8867e+08	5.74147e+08	7.96009e+08	4.36499e+08	1.55817e+08	3.06544e+08	0.397932
W5QIT7	W5QIT7	no known family	FERMT2	FERMT2 - Fermitin family member 2 [a.k.a. W5QIT6_SHEEP, ENSOART00000022951, fermitin family homolog 2 isoform X5, W5QIT7]	W5QIT7_SHEEP Isoform of W5QIT6, Uncharacterized protein OS=Ovis aries OX=9940 GN=FERMT2 PE=4 SV=1;tr	W5QIT7_SHEEP	28.915	28.7638	28.9035	25.8797	28.4833	28.0231	5.06158e+08	4.55792e+08	5.02119e+08	6.17418e+07	3.75261e+08	2.72761e+08	0.484788
W5P6P2	W5P6P2	no known family	RPL7	RPL7 - Uncharacterized protein [a.k.a. W5P6P4, ENSOARG00000005681, ENSOARP00000006098, W5P6P2]	W5P6P2_SHEEP Isoform of W5P6P4, Uncharacterized protein OS=Ovis aries OX=9940 GN=RPL7 PE=4 SV=1;tr	W5P6P2_SHEEP	27.6292	28.0684	28.2368	26.0323	27.5973	26.341	2.07596e+08	2.81463e+08	3.16317e+08	6.86275e+07	2.03058e+08	8.50033e+07	0.442886
W5PE53	W5PE53		C8B	C8B - Complement component 8, beta polypeptide [a.k.a. C8B-201, ENSOART00000008844, XP_004002065, W5PE53]	W5PE53_SHEEP Uncharacterized protein OS=Ovis aries OX=9940 GN=C8B PE=4 SV=1	W5PE53_SHEEP	26.5059	26.7088	26.3628	25.073	25.789	24.9618	9.5296e+07	1.09683e+08	8.62979e+07	3.52964e+07	5.79788e+07	3.26782e+07	0.432419
W5Q3E0	W5Q3E0		THY1	THY1 - Thy-1 cell surface antigen [a.k.a. XP_014956447, 101109906, UPI00029D8F65, W5Q3E0]	W5Q3E0_SHEEP Uncharacterized protein OS=Ovis aries OX=9940 GN=THY1 PE=4 SV=1	W5Q3E0_SHEEP	30.0386	29.5465	30.1254	27.7957	28.4177	29.276	1.10288e+09	7.84099e+08	1.17123e+09	2.32986e+08	3.58577e+08	6.50047e+08	0.405992
W5Q9E1	W5Q9E1		TOMM70A	TOMM70A - Translocase of outer mitochondrial membrane 70 homolog A (S. cerevisiae) [a.k.a. TOMM70, ENSOARP00000019333, Translocase of outer mitochondrial membrane 70, W5Q9E1]	W5Q9E1_SHEEP Uncharacterized protein OS=Ovis aries OX=9940 GN=TOMM70 PE=4 SV=1	W5Q9E1_SHEEP	29.3854	29.628	29.8706	26.7769	29.155	28.7894	7.01249e+08	8.29677e+08	9.81643e+08	1.14988e+08	5.97762e+08	4.6395e+08	0.468326
W5P1S6	W5P1S6		RPN1	RPN1 - Dolichyl-diphosphooligosaccharide--protein glycosyltransferase subunit 1; Essential subunit of the N-oligosaccharyl transferase (OST) complex which catalyzes the transfer of a high mannose oligosaccharide from a lipid-linked oligosaccharide donor to an asparagine residue within an Asn-X-Ser/Thr consensus motif in nascent polypeptide chains; Belongs to the OST1 family [a.k.a. AMGL01046207, …	W5P1S6_SHEEP Dolichyl-diphosphooligosaccharide--protein glycosyltransferase subunit 1 OS=Ovis aries OX=9940 PE=3 SV=1	W5P1S6_SHEEP	31.6572	31.647	31.7392	29.0784	30.3851	31.1512	3.38654e+09	3.36282e+09	3.58462e+09	5.66839e+08	1.40228e+09	2.38469e+09	0.421309
W5Q2N2	W5Q2N2		PSMD12	PSMD12 - Proteasome (prosome, macropain) 26S subunit, non-ATPase, 12 [a.k.a. W5Q2N2, PSMD12-201, Oar.7010]	W5Q2N2_SHEEP Uncharacterized protein OS=Ovis aries OX=9940 GN=PSMD12 PE=4 SV=1	W5Q2N2_SHEEP	24.6266	26.1409	25.0653	23.7052	24.0165	24.5851	2.59034e+07	7.3995e+07	3.51089e+07	1.36762e+07	1.69698e+07	2.51683e+07	0.413416
W5PLB9	W5PLB9		PSMD11	PSMD11 - Proteasome (prosome, macropain) 26S subunit, non-ATPase, 11 [a.k.a. Oar.10714, UPI0003CCF06E, XP_004012524.1, W5PLB9]	W5PLB9_SHEEP Uncharacterized protein OS=Ovis aries OX=9940 GN=PSMD11 PE=4 SV=1	W5PLB9_SHEEP	25.7484	27.0132	27.0279	25.4209	25.1289	25.579	5.6371e+07	1.35452e+08	1.36842e+08	4.49217e+07	3.66904e+07	5.01251e+07	0.400825
W5PBG4	W5PBG4		MCU	MCU - Mitochondrial calcium uniporter [a.k.a. XP_004021505.1, Oar.18686, Mitochondrial calcium uniporter, W5PBG4]	W5PBG4_SHEEP Uncharacterized protein OS=Ovis aries OX=9940 GN=MCU PE=4 SV=1	W5PBG4_SHEEP	27.4588	27.7716	27.9308	25.4487	26.7273	27.2476	1.84468e+08	2.29132e+08	2.55855e+08	4.57945e+07	1.11101e+08	1.59345e+08	0.472386
W5PLF3	W5PLF3		DECR1	DECR1 - 2,4-dienoyl CoA reductase 1, mitochondrial [a.k.a. SDR18C1, AMGL01112940, ENSOART00000011436, W5PLF3]	W5PLF3_SHEEP Uncharacterized protein OS=Ovis aries OX=9940 GN=DECR1 PE=4 SV=1	W5PLF3_SHEEP	28.2046	28.1909	27.6322	27.0586	26.9025	26.3033	3.09343e+08	3.06414e+08	2.08029e+08	1.39785e+08	1.25445e+08	8.28084e+07	0.422486
W5Q0R4	W5Q0R4		CRYAB	CRYAB - Alpha-crystallin B chain; May contribute to the transparency and refractive index of the lens. Has chaperone-like activity, preventing aggregation of various proteins under a wide range of stress conditions [a.k.a. Ovis aries crystallin, alpha B (CRYAB), mRNA., UPI0003CCD9EE, Alpha(B)-crystallin, W5Q0R4]	W5Q0R4_SHEEP Alpha-crystallin B chain OS=Ovis aries OX=9940 GN=CRYAB PE=3 SV=1;sp	W5Q0R4_SHEEP	29.9581	29.5365	29.825	27.5766	29.0003	28.8097	1.04303e+09	7.78682e+08	9.51089e+08	2.00156e+08	5.36997e+08	4.70537e+08	0.435548
W5Q6Q7	W5Q6Q7		VAPB	VAPB - VAMP (vesicle-associated membrane protein)-associated protein B and C [a.k.a. W5Q6Q7_SHEEP, VAPB-201, XP_012044310.1, W5Q6Q7]	W5Q6Q7_SHEEP Uncharacterized protein OS=Ovis aries OX=9940 GN=VAPB PE=4 SV=1	W5Q6Q7_SHEEP	28.5911	28.011	29.0049	26.3916	27.4969	27.9793	4.04371e+08	2.7049e+08	5.38683e+08	8.80378e+07	1.89409e+08	2.64618e+08	0.446679
W5Q8Q7	W5Q8Q7		RPN2	RPN2 - Ribophorin II [a.k.a. XM_004014827.1, oas:100037676, ENSOARG00000017801, W5Q8Q7]	W5Q8Q7_SHEEP Dolichyl-diphosphooligosaccharide--protein glycosyltransferase subunit 2 OS=Ovis aries OX=9940 GN=RPN2 PE=3 SV=1	W5Q8Q7_SHEEP	31.3049	31.1992	31.7626	29.1506	30.0663	30.9356	2.65277e+09	2.46538e+09	3.64341e+09	5.95951e+08	1.12421e+09	2.05369e+09	0.430728
W5Q038	W5Q038		AHNAK	AHNAK - AHNAK nucleoprotein [a.k.a. oas:101110887, AHNAK-201, Oar.180, W5Q038]	W5Q038_SHEEP Uncharacterized protein OS=Ovis aries OX=9940 GN=AHNAK PE=4 SV=1	W5Q038_SHEEP	31.69	32.0465	32.0576	30.7019	29.8172	31.0982	3.46442e+09	4.4357e+09	4.4698e+09	1.74658e+09	9.45962e+08	2.2988e+09	0.403506
W5QHP5	W5QHP5		GNB4	GNB4 - G protein subunit beta 4; Guanine nucleotide binding protein (G protein), beta polypeptide 4 [a.k.a. UPI00029D7A15, AMGL01009500, AMGL01009502, W5QHP5]	W5QHP5_SHEEP Uncharacterized protein OS=Ovis aries OX=9940 GN=GNB4 PE=4 SV=1	W5QHP5_SHEEP	31.5448	31.4317	31.7702	29.6494	30.4497	30.5232	3.13287e+09	2.89662e+09	3.66242e+09	8.42085e+08	1.46647e+09	1.54315e+09	0.397414
W5NY29	W5NY29		RTN4	RTN4 - Reticulon-4 [a.k.a. W5NY29, NP_001138650, AMGL01077401]	W5NY29_SHEEP Reticulon OS=Ovis aries OX=9940 GN=RTN4 PE=4 SV=1	W5NY29_SHEEP	30.8619	30.7353	30.8875	29.3767	29.6468	29.4789	1.9515e+09	1.78756e+09	1.98637e+09	6.97047e+08	8.40548e+08	7.48214e+08	0.399238
W5NUV1	W5NUV1	no known family	GNB1	GNB1 - G protein subunit beta 1; Guanine nucleotide binding protein (G protein), beta polypeptide 1 [a.k.a. XP_004013823.1, W5NUU9, UPI00000230B3, W5NUV1]	W5NUV1_SHEEP Isoform of W5NUU9, Uncharacterized protein OS=Ovis aries OX=9940 GN=GNB1 PE=4 SV=1;tr	W5NUV1_SHEEP	31.468	31.1259	31.6222	29.6185	30.2071	30.397	2.97036e+09	2.34334e+09	3.30554e+09	8.24226e+08	1.23946e+09	1.4139e+09	0.403469
W5NU76	W5NU76		FMOD	FMOD - Fibromodulin [a.k.a. XM_004013543, ENSOART00000001763, XP_004013592.1, W5NU76]	W5NU76_SHEEP Uncharacterized protein OS=Ovis aries OX=9940 GN=FMOD PE=4 SV=1	W5NU76_SHEEP	32.6985	31.9481	32.2032	30.9726	30.9454	30.8522	6.97017e+09	4.14331e+09	4.94447e+09	2.10705e+09	2.06771e+09	1.93835e+09	0.380691
W5PEE7	W5PEE7		PDP1	PDP1 - Pyruvate dehyrogenase phosphatase catalytic subunit 1 [a.k.a. XP_004011887.1, PPM2C, oas:101111813, W5PEE7]	W5PEE7_SHEEP Uncharacterized protein OS=Ovis aries OX=9940 GN=PDP1 PE=3 SV=1	W5PEE7_SHEEP	28.66	28.7541	28.7752	26.7396	28.2781	27.6453	4.2416e+08	4.52743e+08	4.59397e+08	1.12049e+08	3.25514e+08	2.09923e+08	0.484536
W5P8W6	W5P8W6		COL12A1	COL12A1 - Collagen, type XII, alpha 1 [a.k.a. AMGL01105410, XP_004011158, XP_012037779, W5P8W6]	W5P8W6_SHEEP Uncharacterized protein OS=Ovis aries OX=9940 GN=COL12A1 PE=4 SV=1	W5P8W6_SHEEP	32.9595	32.2062	33.1342	31.5544	30.7225	32.0341	8.35238e+09	4.95488e+09	9.42722e+09	3.15381e+09	1.77168e+09	4.39761e+09	0.410086
W5NS65	W5NS65		HIST1H1E	HIST1H1E - Histone cluster 1 H1 family member e [a.k.a. LOC101109652, ENSOARG00000000974, XP_011956518, W5NS65]	W5NS65_SHEEP Uncharacterized protein OS=Ovis aries OX=9940 GN=LOC101109652 PE=3 SV=1	W5NS65_SHEEP	29.7621	29.4921	30.0436	28.5072	28.3237	28.8506	9.10489e+08	7.55109e+08	1.10665e+09	3.81527e+08	3.35959e+08	4.84052e+08	0.433416
W5NRH5	W5NRH5		HSD17B4	HSD17B4 - Hydroxysteroid (17-beta) dehydrogenase 4 [a.k.a. AMGL01092260, MFE-2, XP_004008734, W5NRH5]	W5NRH5_SHEEP Uncharacterized protein OS=Ovis aries OX=9940 GN=HSD17B4 PE=4 SV=1	W5NRH5_SHEEP	29.7125	29.6255	29.9957	28.5134	28.4659	28.7928	8.79721e+08	8.28247e+08	1.07054e+09	3.83168e+08	3.70751e+08	4.6505e+08	0.438713
Q9MZA9	Q9MZA9		VIM	VIM - Vimentin; Vimentins are class-III intermediate filaments found in various non-epithelial cells, especially mesenchymal cells. Vimentin is attached to the nucleus, endoplasmic reticulum, and mitochondria, either laterally or terminally [a.k.a. XM_004014247.1, XM_004014247, Vimentin, Q9MZA9]	VIME_SHEEP Vimentin (Fragment) OS=Ovis aries OX=9940 GN=VIM PE=2 SV=3	VIME_SHEEP	28.9167	29.2098	29.6008	28.3917	27.2828	28.6164	5.06742e+08	6.20923e+08	8.14207e+08	3.52179e+08	1.63286e+08	4.11537e+08	0.477376
W5PHF2	W5PHF2		ACADSB	ACADSB - acyl-CoA dehydrogenase, short/branched chain [a.k.a. ACADSB-201, XP_004020403, AMGL01064461, W5PHF2]	W5PHF2_SHEEP Uncharacterized protein OS=Ovis aries OX=9940 GN=ACADSB PE=3 SV=1	W5PHF2_SHEEP	29.3255	29.0479	28.9131	27.7555	27.943	28.1757	6.7274e+08	5.55011e+08	5.05482e+08	2.26592e+08	2.58039e+08	3.03194e+08	0.454541
W5Q548	W5Q548		TMED5	TMED5 - Transmembrane emp24 protein transport domain containing 5 [a.k.a. TMED5-201, AMGL01003352, CGI-100, W5Q548]	W5Q548_SHEEP Uncharacterized protein OS=Ovis aries OX=9940 GN=TMED5 PE=3 SV=1	W5Q548_SHEEP	26.59	26.8987	27.2606	25.7794	25.7769	26.0991	1.01014e+08	1.25117e+08	1.6079e+08	5.75936e+07	5.74928e+07	7.18787e+07	0.483214
W5PUD8	W5PUD8		2020-03-02	MARC2 - Mitochondrial amidoxime reducing component 2 [a.k.a. AMGL01020852, FLJ20605, XM_004013983.1, W5PUD8]	W5PUD8_SHEEP Uncharacterized protein OS=Ovis aries OX=9940 GN=MARC2 PE=4 SV=1	W5PUD8_SHEEP	28.9337	28.8728	29.0126	27.4789	28.2762	27.8614	5.12747e+08	4.91552e+08	5.41568e+08	1.87063e+08	3.25067e+08	2.43841e+08	0.489028
W5QFL1	W5QFL1		ENSOARG00000020032	ENSOARG00000020032 - Tubulin alpha chain; Tubulin is the major constituent of microtubules. It binds two moles of GTP, one at an exchangeable site on the beta chain and one at a non-exchangeable site on the alpha chain [a.k.a. LOC101116286, ENSOART00000021811, 101116286, W5QFL1]	W5QFL1_SHEEP Tubulin alpha chain OS=Ovis aries OX=9940 GN=LOC101116286 PE=3 SV=1;tr	W5QFL1_SHEEP	32.3698	32.2211	32.0429	30.9131	30.5929	31.5851	5.54981e+09	5.00647e+09	4.42463e+09	2.02199e+09	1.61944e+09	3.22155e+09	0.458116
W5PPT6	W5PPT6		TUBB	TUBB - Tubulin beta chain; Tubulin is the major constituent of microtubules. It binds two moles of GTP, one at an exchangeable site on the beta chain and one at a non-exchangeable site on the alpha chain [a.k.a. TUBB2A, XM_004018985, Oar.13420, W5PPT6]	W5PPT6_SHEEP Tubulin beta chain OS=Ovis aries OX=9940 GN=TUBB PE=3 SV=1	W5PPT6_SHEEP	32.0827	31.7041	32.0655	30.4483	30.4971	31.4442	4.54848e+09	3.49847e+09	4.49457e+09	1.46505e+09	1.51545e+09	2.92168e+09	0.470611
W5PNW7	W5PNW7		VIM	VIM - Vimentin; Vimentins are class-III intermediate filaments found in various non-epithelial cells, especially mesenchymal cells. Vimentin is attached to the nucleus, endoplasmic reticulum, and mitochondria, either laterally or terminally [a.k.a. XM_004014247.1, XM_004014247, Vimentin, W5PNW7]	W5PNW7_SHEEP Vimentin OS=Ovis aries OX=9940 GN=VIM PE=3 SV=1	W5PNW7_SHEEP	34.8813	34.6332	35.1558	33.4806	33.0801	34.352	3.16468e+10	2.66468e+10	3.82778e+10	1.1986e+10	9.08016e+09	2.19269e+10	0.445194
P32262	P32262		SERPINC1	SERPINC1 - Antithrombin-III; Most important serine protease inhibitor in plasma that regulates the blood coagulation cascade. AT-III inhibits thrombin, matriptase-3/TMPRSS7, as well as factors IXa, Xa and XIa. Its inhibitory activity is greatly enhanced in the presence of heparin (By similarity) [a.k.a. AT3, ENSOART00000014050, Oar.420, P32262]	ANT3_SHEEP Antithrombin-III OS=Ovis aries OX=9940 GN=SERPINC1 PE=2 SV=1;tr	ANT3_SHEEP	29.5254	29.5418	30.0766	28.5447	28.4666	28.9714	7.72752e+08	7.8155e+08	1.13233e+09	3.91562e+08	3.7093e+08	5.26321e+08	0.479714
W5NS44	W5NS44		HSD17B12	HSD17B12 - Hydroxysteroid (17-beta) dehydrogenase 12; Belongs to the short-chain dehydrogenases/reductases (SDR) family [a.k.a. 1.1.1.330, AMGL01033228, EC 1.1.1.62, W5NS44]	W5NS44_SHEEP Uncharacterized protein OS=Ovis aries OX=9940 GN=HSD17B12 PE=3 SV=1	W5NS44_SHEEP	30.0902	30.3258	30.5153	28.867	29.5078	29.4332	1.14302e+09	1.34582e+09	1.53467e+09	4.89601e+08	7.6339e+08	7.24876e+08	0.491578
Q6B3Y2	Q6B3Y2		CAV1	CAV1 - Caveolin-1; Involved in the costimulatory signal essential for T- cell receptor (TCR)-mediated T-cell activation. Its binding to DPP4 induces T-cell proliferation and NF-kappa-B activation in a T-cell receptor/CD3-dependent manner. May act as a scaffolding protein within caveolar membranes. Interacts directly with G- protein alpha subunits and can functionally regulate their activity. Form…	CAV1_SHEEP Caveolin-1 OS=Ovis aries OX=9940 GN=CAV1 PE=2 SV=1	CAV1_SHEEP	30.3953	29.7105	30.004	29.0777	28.7247	29.2883	1.41225e+09	8.78494e+08	1.07671e+09	5.66582e+08	4.43594e+08	6.55638e+08	0.494681
P02075	P02075		HBB	HBB - Hemoglobin subunit beta; Involved in oxygen transport from the lung to the various peripheral tissues; Belongs to the globin family [a.k.a. UPI0003CCEAD4, XP_004016290, XM_004016241, P02075]	HBB_SHEEP Hemoglobin subunit beta OS=Ovis aries OX=9940 GN=HBB PE=1 SV=2;tr	HBB_SHEEP	35.2609	35.2607	35.3698	36.6567	36.0445	36.3659	4.11713e+10	4.11653e+10	4.43985e+10	1.08338e+11	7.087e+10	8.85579e+10	2.1128
W5PMR1	W5PMR1		ENSOARG00000010944	ENSOARG00000010944 - Hemoglobin subunit alpha-1/2; Involved in oxygen transport from the lung to the various peripheral tissues; Belongs to the globin family [a.k.a. LOC101108797, Hemoglobin alpha-1/2 chain, Hemoglobin subunit alpha-1/2, W5PMR1]	W5PMR1_SHEEP Uncharacterized protein OS=Ovis aries OX=9940 GN=LOC101108797 PE=3 SV=1	W5PMR1_SHEEP	30.5023	30.5715	30.651	32.1037	31.3521	31.2995	1.52095e+09	1.59567e+09	1.686e+09	4.6151e+09	2.74112e+09	2.64286e+09	2.082
W5PF65	W5PF65		TF	TF - Transferrin; Belongs to the transferrin family [a.k.a. O18780, ENSOARG00000008456, XP_004003379.1, W5PF65]	W5PF65_SHEEP Uncharacterized protein OS=Ovis aries OX=9940 GN=TF PE=3 SV=1	W5PF65_SHEEP	32.5587	32.3512	32.0797	33.7349	33.395	33.0876	6.32617e+09	5.47871e+09	4.53895e+09	1.42961e+10	1.1295e+10	9.12755e+09	2.12427
W5NRI1	W5NRI1		ENSOARG00000000751	ENSOARG00000000751 - Uncharacterized protein [a.k.a. LOC101113831, XM_004022862, W5NRI1_SHEEP, W5NRI1]	W5NRI1_SHEEP Uncharacterized protein OS=Ovis aries OX=9940 GN=LOC101113831 PE=4 SV=1	W5NRI1_SHEEP	29.914	30.236	30.3329	31.4315	30.9326	31.1391	1.01162e+09	1.2646e+09	1.3524e+09	2.89619e+09	2.04952e+09	2.36477e+09	2.01467
W5PDG3	W5PDG3		GAPDH	GAPDH - Glyceraldehyde-3-phosphate dehydrogenase; Has both glyceraldehyde-3-phosphate dehydrogenase and nitrosylase activities, thereby playing a role in glycolysis and nuclear functions, respectively. Glyceraldehyde-3-phosphate dehydrogenase is a key enzyme in glycolysis that catalyzes the first step of the pathway by converting D-glyceraldehyde 3- phosphate (G3P) into 3-phospho-D-glyceroyl phos…	W5PDG3_SHEEP Glyceraldehyde-3-phosphate dehydrogenase OS=Ovis aries OX=9940 GN=GAPDH PE=3 SV=1	W5PDG3_SHEEP	33.214	32.2621	32.1686	33.8573	33.4532	33.6765	9.96363e+09	5.15065e+09	4.82737e+09	1.55623e+10	1.17602e+10	1.37293e+10	2.0586
W5QAB1	W5QAB1		HPX	HPX - Hemopexin [a.k.a. XP_004016259.1, ENSOARP00000019654, ENSOART00000019927, W5QAB1]	W5QAB1_SHEEP Uncharacterized protein OS=Ovis aries OX=9940 GN=HPX PE=4 SV=1	W5QAB1_SHEEP	30.1521	29.869	29.8926	31.2656	31.0099	30.7788	1.19316e+09	9.80554e+08	9.96716e+08	2.58157e+09	2.16232e+09	1.84219e+09	2.07735
W5PIG7	W5PIG7	no known family	ENO1	ENO1 - Uncharacterized protein; Enolase 1, (alpha) [a.k.a. XM_004013746, ENO1-201, enolase 1, (alpha), W5PIG7]	W5PIG7_SHEEP Isoform of W5PIG6, Uncharacterized protein OS=Ovis aries OX=9940 GN=ENO1 PE=3 SV=1;tr	W5PIG7_SHEEP	31.0223	30.1746	30.2126	32.162	31.1341	31.4198	2.1809e+09	1.21189e+09	1.24425e+09	4.80545e+09	2.35659e+09	2.87272e+09	2.16405
W5QCP9	W5QCP9		COL6A3	COL6A3 - Collagen, type VI, alpha 3 [a.k.a. COL6A1, XM_004003460, AMGL01000491, W5QCP9]	W5QCP9_SHEEP Uncharacterized protein OS=Ovis aries OX=9940 GN=COL6A3 PE=4 SV=1	W5QCP9_SHEEP	31.4479	31.4587	31.798	33.281	31.9296	32.9306	2.92923e+09	2.95131e+09	3.73386e+09	1.04369e+10	4.09047e+09	8.18656e+09	2.36249
W5PGT6	W5PGT6		C6	C6 - Complement component 6 [a.k.a. UPI0003CCFCBC, XM_004017016.1, complement component C6, W5PGT6]	W5PGT6_SHEEP Uncharacterized protein OS=Ovis aries OX=9940 GN=C6 PE=4 SV=1	W5PGT6_SHEEP	26.7713	27.1066	27.3347	28.3629	28.2564	27.5536	1.14539e+08	1.44512e+08	1.69267e+08	3.45202e+08	3.20638e+08	1.96998e+08	2.01448
W5PZS7	W5PZS7		SERPINA1	SERPINA1 - Alpha-1-antiproteinase; Inhibits human leukocyte elastase, pig pancreatic elastase and bovine trypsin on a 1:1 molar basis; Belongs to the serpin family [a.k.a. NP_001009799, Alpha-1-proteinase inhibitor, ENSOARP00000015963, W5PZS7]	W5PZS7_SHEEP Uncharacterized protein OS=Ovis aries OX=9940 GN=SERPINA1 PE=3 SV=1;sp	W5PZS7_SHEEP	29.0676	29.736	28.8763	31.2484	29.9558	29.7537	5.6263e+08	8.94169e+08	4.92757e+08	2.551e+09	1.04131e+09	9.05205e+08	2.30694
W5PE27	W5PE27		ESD	ESD - S-formylglutathione hydrolase; Serine hydrolase involved in the detoxification of formaldehyde [a.k.a. Esterase D, XP_012039821, W5PE27]	W5PE27_SHEEP S-formylglutathione hydrolase OS=Ovis aries OX=9940 GN=ESD PE=3 SV=1	W5PE27_SHEEP	26.618	25.8907	25.6254	27.7727	26.7771	26.7535	1.02995e+08	6.22137e+07	5.17639e+07	2.29303e+08	1.15001e+08	1.13135e+08	2.10827
W5PX34	W5PX34		LYPLA1	LYPLA1 - Uncharacterized protein [a.k.a. UPI0003CCED33, Oar.13815, LYPLA1-201, W5PX34]	W5PX34_SHEEP Uncharacterized protein OS=Ovis aries OX=9940 GN=LYPLA1 PE=4 SV=1	W5PX34_SHEEP	24.7315	24.5204	23.5969	26.0385	24.9945	24.7709	2.78565e+07	2.40647e+07	1.26873e+07	6.89228e+07	3.34266e+07	2.86276e+07	2.02724
W5PSA6	W5PSA6		RMDN1	RMDN1 - Regulator of microtubule dynamics 1 [a.k.a. FAM82B, FLJ20665, ENSOART00000013531, W5PSA6]	W5PSA6_SHEEP Uncharacterized protein OS=Ovis aries OX=9940 GN=RMDN1 PE=4 SV=1	W5PSA6_SHEEP	25.6549	25.0478	25.3695	25.7933	27.0997	26.268	5.28305e+07	3.46841e+07	4.33489e+07	5.81523e+07	1.43821e+08	8.08086e+07	2.16089
W5P5Q1	W5P5Q1		ENSOARG00000005357	ENSOARG00000005357 - Uncharacterized protein [a.k.a. ENSOARP00000005754, UPI0003CCEFB9, AMGL01010963, W5P5Q1]	W5P5Q1_SHEEP Uncharacterized protein OS=Ovis aries OX=9940 PE=4 SV=1	W5P5Q1_SHEEP	27.2857	27.2322	26.1898	28.2944	28.2646	27.4538	1.63609e+08	1.57655e+08	7.65456e+07	3.29197e+08	3.2248e+08	1.83825e+08	2.10025
W5PP77	W5PP77		GLOD4	GLOD4 - Uncharacterized protein; Glyoxalase domain containing 4 [a.k.a. ENSOARG00000011431, ENSOART00000012429, Glyoxalase domain containing 4, W5PP77]	W5PP77_SHEEP Glyoxalase domain containing 4 OS=Ovis aries OX=9940 GN=GLOD4 PE=4 SV=1	W5PP77_SHEEP	23.4862	23.7372	23.4127	24.2796	25.0436	24.2073	1.17502e+07	1.39836e+07	1.1167e+07	2.03652e+07	3.45829e+07	1.937e+07	2.01399
W5P612	W5P612	no known family	CRELD1	CRELD1 - Cysteine-rich with EGF-like domains 1 [a.k.a. W5P611_SHEEP, ENSOARP00000005866, AVSD2, W5P612]	W5P612_SHEEP Isoform of W5P611, Uncharacterized protein OS=Ovis aries OX=9940 GN=CRELD1 PE=4 SV=1;tr	W5P612_SHEEP	24.7119	24.7899	24.6112	25.4676	26.3526	25.3517	2.74799e+07	2.90066e+07	2.56273e+07	4.63978e+07	8.56875e+07	4.28165e+07	2.12999
W5PC25	W5PC25		ENSOARG00000007446	ENSOARG00000007446 - Uncharacterized protein [a.k.a. LOC101116273, W5PC25_SHEEP, AMGL01063760, W5PC25]	W5PC25_SHEEP Uncharacterized protein OS=Ovis aries OX=9940 GN=LOC101116273 PE=4 SV=1	W5PC25_SHEEP	25.1687	25.0106	24.8596	26.0784	25.9275	26.1938	3.77171e+07	3.3803e+07	3.04427e+07	7.08583e+07	6.38191e+07	7.6758e+07	2.07365
W5QI03	W5QI03		TPM1	TPM1 - Uncharacterized protein; Ovis aries tropomyosin 1 (alpha) (TPM1), mRNA; Belongs to the tropomyosin family [a.k.a. ENSOART00000022658, AMGL01103098, UPI0003CCE866, W5QI03]	W5QI03_SHEEP Uncharacterized protein OS=Ovis aries OX=9940 GN=TPM1 PE=3 SV=1	W5QI03_SHEEP	30.6808	30.6747	31.3232	32.4596	32.1222	32.0562	1.72121e+09	1.71392e+09	2.6868e+09	5.90606e+09	4.67464e+09	4.46566e+09	2.45778
W5PN24	W5PN24		EEF1A2	EEF1A2 - Uncharacterized protein; Eukaryotic translation elongation factor 1 alpha 2 [a.k.a. EEF1AL, EEF1A2-201, XP_004014458, W5PN24]	W5PN24_SHEEP Uncharacterized protein OS=Ovis aries OX=9940 GN=EEF1A2 PE=3 SV=1	W5PN24_SHEEP	27.9241	27.4973	26.1251	28.2069	28.6713	28.2346	2.54674e+08	1.89462e+08	7.31897e+07	3.09835e+08	4.27491e+08	3.15839e+08	2.03578
W5NX51	W5NX51		APOA1	APOA1 - Apolipoprotein A-I [a.k.a. ENSOARP00000002748, ENSOARG00000002586, ENSOART00000002803, W5NX51]	W5NX51_SHEEP Apolipoprotein A1 OS=Ovis aries OX=9940 GN=APOA1 PE=3 SV=1	W5NX51_SHEEP	27.9634	27.3819	28.0048	29.2264	28.5374	29.2375	2.6172e+08	1.74889e+08	2.69336e+08	6.28093e+08	3.89605e+08	6.32953e+08	2.33821
P62896	P62896		CYCS	CYCS - Cytochrome c; Electron carrier protein. The oxidized form of the cytochrome c heme group can accept an electron from the heme group of the cytochrome c1 subunit of cytochrome reductase. Cytochrome c then transfers this electron to the cytochrome oxidase complex, the final protein carrier in the mitochondrial electron-transport chain [a.k.a. LOC101107954, CYC, UPI0000500134, P62896]	CYC_SHEEP Cytochrome c OS=Ovis aries OX=9940 GN=CYCS PE=1 SV=2;;tr	CYC_SHEEP	29.8343	29.076	29.2204	30.7963	30.8452	30.3522	9.5723e+08	5.65914e+08	6.255e+08	1.86465e+09	1.92898e+09	1.37065e+09	2.40351
W5QC41	W5QC41		PKM	PKM - Pyruvate kinase, muscle; Belongs to the pyruvate kinase family [a.k.a. ENSOARP00000020288, EC 2.7.1.40, Pyruvate kinase, muscle, W5QC41]	W5QC41_SHEEP Pyruvate kinase OS=Ovis aries OX=9940 GN=PKM PE=3 SV=1	W5QC41_SHEEP	31.1686	30.9653	30.5806	32.6895	32.157	31.9632	2.41376e+09	2.0965e+09	1.60571e+09	6.92669e+09	4.78885e+09	4.18674e+09	2.60012
W5P1S3	W5P1S3		SLC25A13	SLC25A13 - Solute carrier family 25 (aspartate/glutamate carrier), member 13; Belongs to the mitochondrial carrier (TC 2.A.29) family [a.k.a. UPI0003CCDF2D, W5P1S5, W5P1S3]	W5P1S3_SHEEP Uncharacterized protein OS=Ovis aries OX=9940 GN=SLC25A13 PE=3 SV=1;tr	W5P1S3_SHEEP	28.5129	28.6802	28.0434	29.7832	29.5725	29.6698	3.83047e+08	4.30126e+08	2.76639e+08	9.23952e+08	7.98354e+08	8.54058e+08	2.36404
W5QBM4	W5QBM4		ALCAM	ALCAM - Activated leukocyte cell adhesion molecule [a.k.a. XM_004002895, ENSOARG00000018737, AMGL01007943, W5QBM4]	W5QBM4_SHEEP Uncharacterized protein OS=Ovis aries OX=9940 GN=ALCAM PE=4 SV=1	W5QBM4_SHEEP	27.8584	27.9286	26.2995	28.935	28.6927	28.1298	2.43338e+08	2.55478e+08	8.25917e+07	5.13229e+08	4.33873e+08	2.93703e+08	2.13414
W5QBI9	W5QBI9		ANXA3	ANXA3 - Annexin A3 [a.k.a. ANXA3-202, UPI00029D666A, Oar.4195, W5QBI9]	W5QBI9_SHEEP Annexin OS=Ovis aries OX=9940 GN=ANXA3 PE=3 SV=1;tr	W5QBI9_SHEEP	30.2055	29.519	29.5051	31.7175	30.5292	30.9867	1.23814e+09	7.69337e+08	7.61944e+08	3.5311e+09	1.54952e+09	2.12775e+09	2.60284
W5Q8M3	W5Q8M3		AGL	AGL - Amylo-alpha-1, 6-glucosidase, 4-alpha-glucanotransferase [a.k.a. oas:101111501, AMGL01003641, EC 2.4.1.25, W5Q8M3]	W5Q8M3_SHEEP Uncharacterized protein OS=Ovis aries OX=9940 GN=AGL PE=4 SV=1	W5Q8M3_SHEEP	25.4513	27.0327	27.301	28.4103	27.3923	27.5941	4.58792e+07	1.37295e+08	1.65356e+08	3.56738e+08	1.76154e+08	2.0261e+08	2.11029
W5NZ87	W5NZ87		NAALAD2	NAALAD2 - N-acetylated alpha-linked acidic dipeptidase 2 [a.k.a. NAALAD2-201, NAALADASE2, AMGL01060347, W5NZ87]	W5NZ87_SHEEP Uncharacterized protein OS=Ovis aries OX=9940 GN=NAALAD2 PE=4 SV=1	W5NZ87_SHEEP	27.6606	25.9737	27.7188	28.4706	27.719	28.9149	2.12164e+08	6.58957e+07	2.20893e+08	3.71979e+08	2.20921e+08	5.06115e+08	2.20264
W5QGD1	W5QGD1		ENSOARG00000020280	ENSOARG00000020280 - L-lactate dehydrogenase ; Belongs to the LDH/MDH superfamily [a.k.a. LDHB, AMGL01082894, XM_004006792.1, W5QGD1]	W5QGD1_SHEEP L-lactate dehydrogenase OS=Ovis aries OX=9940 GN=LDHB PE=3 SV=1	W5QGD1_SHEEP	31.2569	31.2823	30.6399	32.8197	32.3688	32.3212	2.56606e+09	2.61154e+09	1.67317e+09	7.58063e+09	5.54613e+09	5.3661e+09	2.69939
W5P094	W5P094		NID1	NID1 - Nidogen 1 [a.k.a. XP_004021660.1, NID1-201, AMGL01070749, W5P094]	W5P094_SHEEP Uncharacterized protein OS=Ovis aries OX=9940 GN=NID1 PE=4 SV=1	W5P094_SHEEP	25.9892	26.9614	27.329	28.1581	27.8337	28.0241	6.66071e+07	1.30672e+08	1.686e+08	2.99515e+08	2.39208e+08	2.72957e+08	2.21844
W5PG09	W5PG09		PGK2	PGK2 - Phosphoglycerate kinase 2 [a.k.a. W5PG09_SHEEP, UPI00029D80BE, XP_004018931, W5PG09]	W5PG09_SHEEP Phosphoglycerate kinase OS=Ovis aries OX=9940 GN=PGK2 PE=3 SV=1	W5PG09_SHEEP	27.1131	26.4596	26.2152	28.0071	27.6845	27.8262	1.45159e+08	9.2285e+07	7.79016e+07	2.69764e+08	2.1571e+08	2.37971e+08	2.29413
W5NRW4	W5NRW4		TPM4	TPM4 - Tropomyosin 4; Belongs to the tropomyosin family [a.k.a. ENSOART00000000937, XM_004008453.1, UPI00005A3BF2, W5NRW4]	W5NRW4_SHEEP Uncharacterized protein OS=Ovis aries OX=9940 GN=TPM4 PE=3 SV=1	W5NRW4_SHEEP	26.3299	27.0835	28.0489	28.3138	28.3045	28.6851	8.43534e+07	1.42213e+08	2.77683e+08	3.33665e+08	3.31515e+08	4.31588e+08	2.17505
W5P5W9	W5P5W9		TPI1	TPI1 - Triosephosphate isomerase 1 [a.k.a. Oar.5051, TPI1-201, triosephosphate isomerase isoform X1, W5P5W9]	W5P5W9_SHEEP Triosephosphate isomerase OS=Ovis aries OX=9940 GN=TPI1 PE=3 SV=1	W5P5W9_SHEEP	30.0239	29.0499	29.3188	31.2292	30.5133	30.8216	1.09169e+09	5.55777e+08	6.69634e+08	2.51729e+09	1.53252e+09	1.89769e+09	2.56679
W5PUA9	W5PUA9		PGM5	PGM5 - Uncharacterized protein; Phosphoglucomutase 5; Belongs to the phosphohexose mutase family [a.k.a. AMGL01049661, AMGL01049656, AMGL01049662, W5PUA9]	W5PUA9_SHEEP Uncharacterized protein OS=Ovis aries OX=9940 GN=PGM5 PE=3 SV=1	W5PUA9_SHEEP	29.0528	27.8282	27.8694	29.7225	29.5122	29.6025	5.56902e+08	2.38296e+08	2.45209e+08	8.85868e+08	7.65701e+08	8.15139e+08	2.37091
W5Q4Q3	W5Q4Q3		SERPIND1	SERPIND1 - Serpin family D member 1; Serpin peptidase inhibitor, clade D (heparin cofactor), member 1; Belongs to the serpin family [a.k.a. D22S673, HC-II, HC2, W5Q4Q3]	W5Q4Q3_SHEEP Serpin family D member 1 OS=Ovis aries OX=9940 GN=SERPIND1 PE=3 SV=1	W5Q4Q3_SHEEP	25.4079	25.7224	25.3226	27.0098	26.2625	26.9123	4.45187e+07	5.53606e+07	4.1963e+07	1.35128e+08	8.04989e+07	1.26298e+08	2.4106
W5P6F4	W5P6F4		C5	C5 - Complement component 5 [a.k.a. XM_004003966, AMGL01046795, ENSOARP00000006008, W5P6F4]	W5P6F4_SHEEP Uncharacterized protein OS=Ovis aries OX=9940 GN=C5 PE=4 SV=1	W5P6F4_SHEEP	29.4387	29.6692	30.3449	31.3534	31.2502	31.2205	7.27686e+08	8.53698e+08	1.36374e+09	2.7435e+09	2.55415e+09	2.5021e+09	2.64836
W5P5I0	W5P5I0	no known family	CFI	CFI - Complement factor I; Belongs to the peptidase S1 family [a.k.a. XM_004009622, W5P5I0, UPI0003CCDE4B]	W5P5I0_SHEEP Isoform of W5P5I3, Uncharacterized protein OS=Ovis aries OX=9940 GN=CFI PE=3 SV=1;tr	W5P5I0_SHEEP	28.4536	27.6067	28.4013	28.8087	30.0352	29.766	3.67599e+08	2.04379e+08	3.54522e+08	4.70197e+08	1.10028e+09	9.12943e+08	2.68043
W5QFQ0	W5QFQ0	no known family	MDH1	MDH1 - Malate dehydrogenase 1, NAD (soluble) [a.k.a. Malate dehydrogenase, XM_004005845.1, W5QFQ0]	W5QFQ0_SHEEP Isoform of W5QFQ1, Malate dehydrogenase OS=Ovis aries OX=9940 GN=MDH1 PE=3 SV=1;tr	W5QFQ0_SHEEP	29.7423	29.4755	28.9727	31.2378	30.909	30.3761	8.98113e+08	7.46461e+08	5.26793e+08	2.53237e+09	2.01627e+09	1.39357e+09	2.73663
W5PUH7	W5PUH7	no known family	GSTP1	GSTP1 - Uncharacterized protein; Glutathione S-transferase pi 1; Belongs to the GST superfamily [a.k.a. GSTP, ENSOARP00000014106, XM_004019722, W5PUH7]	W5PUH7_SHEEP Isoform of W5PUH4, Uncharacterized protein OS=Ovis aries OX=9940 PE=3 SV=1;tr	W5PUH7_SHEEP	29.05	28.7192	28.4447	30.5159	29.8219	30.2686	5.55792e+08	4.41908e+08	3.65356e+08	1.53531e+09	9.49019e+08	1.29348e+09	2.77157
W5PG71	W5PG71		DDX39B	DDX39B - DExD-box helicase 39B; DEAD (Asp-Glu-Ala-Asp) box polypeptide 39B [a.k.a. EC 3.6.4.13, XM_004018966, XP_004019014.1, W5PG71]	W5PG71_SHEEP Uncharacterized protein OS=Ovis aries OX=9940 GN=DDX39B PE=4 SV=1;tr	W5PG71_SHEEP	24.9984	24.6188	24.4301	26.0894	26.1828	25.6775	3.35176e+07	2.57631e+07	2.26037e+07	7.14004e+07	7.6175e+07	5.36663e+07	2.45763
W5P8X9	W5P8X9		CLIC4	CLIC4 - Chloride intracellular channel 4; Belongs to the chloride channel CLIC family [a.k.a. XP_004005159.1, CLIC4-201, Oar.8936, W5P8X9]	W5P8X9_SHEEP Chloride intracellular channel protein OS=Ovis aries OX=9940 GN=CLIC4 PE=3 SV=1	W5P8X9_SHEEP	26.2807	27.0673	26.7186	27.4451	28.1442	28.7287	8.15204e+07	1.40628e+08	1.10437e+08	1.82719e+08	2.96656e+08	4.44844e+08	2.7789
W5P1X9	W5P1X9		ALDOA	ALDOA - Aldolase A, fructose-bisphosphate [a.k.a. XP_011959751.1, XM_004020882.1, ALDOA-201, W5P1X9]	W5P1X9_SHEEP Fructose-bisphosphate aldolase OS=Ovis aries OX=9940 GN=ALDOA PE=3 SV=1	W5P1X9_SHEEP	31.5949	31.2536	30.8223	33.3334	32.7732	32.6387	3.24355e+09	2.56021e+09	1.89861e+09	1.08233e+10	7.34054e+09	6.68697e+09	3.22639
W5QDB4	W5QDB4		ENSOARG00000019281	ENSOARG00000019281 - Uncharacterized protein [a.k.a. LOC101107401, ENSOART00000020997, W5QDB4]	W5QDB4_SHEEP Uncharacterized protein OS=Ovis aries OX=9940 GN=LOC101107401 PE=4 SV=1	W5QDB4_SHEEP	25.2466	25.0426	25.8132	26.2827	26.4129	27.5807	3.98079e+07	3.45593e+07	5.89593e+07	8.16371e+07	8.93479e+07	2.00733e+08	2.78803
W5QCY6	W5QCY6		GMPR2	GMPR2 - GMP reductase; Catalyzes the irreversible NADPH-dependent deamination of GMP to IMP. It functions in the conversion of nucleobase, nucleoside and nucleotide derivatives of G to A nucleotides, and in maintaining the intracellular balance of A and G nucleotides [a.k.a. GMPR, guanosine monophosphate reductase 2, XM_004010302, W5QCY6]	W5QCY6_SHEEP GMP reductase OS=Ovis aries OX=9940 GN=GMPR2 PE=3 SV=1	W5QCY6_SHEEP	24.9121	24.7554	25.3736	26.9283	25.9468	26.29	3.15704e+07	2.83211e+07	4.34733e+07	1.27706e+08	6.46802e+07	8.20523e+07	2.65505
P00349	P00349		PGD	PGD - 6-phosphogluconate dehydrogenase, decarboxylating; Catalyzes the oxidative decarboxylation of 6- phosphogluconate to ribulose 5-phosphate and CO(2), with concomitant reduction of NADP to NADPH [a.k.a. oas:443541, ENSOARP00000005726, 6PGD_SHEEP, P00349]	6PGD_SHEEP 6-phosphogluconate dehydrogenase, decarboxylating OS=Ovis aries OX=9940 GN=PGD PE=1 SV=4;tr	6PGD_SHEEP	27.0996	25.4899	26.9331	27.1565	27.9259	28.8532	1.43811e+08	4.71235e+07	1.28136e+08	1.49598e+08	2.54997e+08	4.84924e+08	2.78784
W5Q5G8	W5Q5G8		TKT	TKT - Transketolase [a.k.a. XP_004018433, ENSOART00000018209, oas:101107229, W5Q5G8]	W5Q5G8_SHEEP Uncharacterized protein OS=Ovis aries OX=9940 GN=TKT PE=4 SV=1	W5Q5G8_SHEEP	27.1561	26.3321	26.5674	27.9364	27.8643	28.7691	1.49558e+08	8.44776e+07	9.94437e+07	2.56858e+08	2.44344e+08	4.57457e+08	2.87471
W5QBV3	W5QBV3		PGK1	PGK1 - Ovis aries phosphoglycerate kinase 1 (PGK1), mRNA [a.k.a. AMGL01116167, ENSOARG00000018803, 2.7.2.3, W5QBV3]	W5QBV3_SHEEP Phosphoglycerate kinase OS=Ovis aries OX=9940 GN=PGK1 PE=3 SV=1	W5QBV3_SHEEP	29.9226	29.158	28.8294	31.3593	30.6994	30.826	1.01767e+09	5.98995e+08	4.77007e+08	2.75483e+09	1.74357e+09	1.9035e+09	3.05774
W5PRR2	W5PRR2		GPC4	GPC4 - Glypican 4; Cell surface proteoglycan that bears heparan sulfate [a.k.a. XM_004022334, oas:101109518, W5PRR2_SHEEP, W5PRR2]	W5PRR2_SHEEP Uncharacterized protein OS=Ovis aries OX=9940 GN=GPC4 PE=3 SV=1	W5PRR2_SHEEP	27.7229	27.1075	26.8799	29.3886	28.1579	28.8176	2.21518e+08	1.44598e+08	1.235e+08	7.02815e+08	2.99481e+08	4.73099e+08	3.01337
W5PM66	W5PM66		HCCS	HCCS - Cytochrome c heme lyase; Links covalently the heme group to the apoprotein of cytochrome c [a.k.a. LOC101118248, oas:101118248, ENSOARG00000010764, W5PM66]	W5PM66_SHEEP Cytochrome c heme lyase OS=Ovis aries OX=9940 GN=HCCS PE=3 SV=1	W5PM66_SHEEP	25.0756	23.7861	24.8782	26.7252	25.8033	25.4334	3.53597e+07	1.4465e+07	3.08387e+07	1.10937e+08	5.85544e+07	4.53131e+07	2.66297
W5PBY2	W5PBY2	no known family	C4BPA	C4BPA - Complement component 4 binding protein, alpha [a.k.a. LOC101119740, UPI0003CD1391, Complement component 4 binding protein, alpha, W5PBY2]	W5PBY2_SHEEP Isoform of W5PBY0, Uncharacterized protein OS=Ovis aries OX=9940 GN=C4BPA PE=4 SV=1;tr	W5PBY2_SHEEP	30.233	30.3503	30.9296	32.1742	31.7267	32.8529	1.26193e+09	1.36881e+09	2.04527e+09	4.84624e+09	3.55386e+09	7.75713e+09	3.45535
W5P500	W5P500		PSMB1	PSMB1 - Proteasome (prosome, macropain) subunit, beta type, 1 [a.k.a. UPI00029D5064, ENSOARG00000005131, proteasome subunit beta type-1, W5P500]	W5P500_SHEEP Proteasome subunit beta OS=Ovis aries OX=9940 GN=PSMB1 PE=3 SV=1	W5P500_SHEEP	26.4216	27.6075	26.7698	29.028	27.8428	28.6147	8.98836e+07	2.04491e+08	1.14426e+08	5.47394e+08	2.40729e+08	4.11029e+08	2.93334
W5Q3Y4	W5Q3Y4	no known family	ATP2A2	ATP2A2 - Calcium-transporting ATPase; This magnesium-dependent enzyme catalyzes the hydrolysis of ATP coupled with the transport of calcium [a.k.a. XP_011953173, XP_004017408, W5Q3Y8, W5Q3Y4]	W5Q3Y4_SHEEP Isoform of W5Q3Y9, Calcium-transporting ATPase OS=Ovis aries OX=9940 GN=ATP2A2 PE=3 SV=1	W5Q3Y4_SHEEP	28.5077	27.8864	28.0153	29.513	30.429	29.398	3.81669e+08	2.48106e+08	2.71306e+08	7.66126e+08	1.44559e+09	7.07439e+08	3.23962
W5PK04	W5PK04		PGAM4	PGAM4 - Phosphoglycerate mutase family member 4; Belongs to the phosphoglycerate mutase family. BPG- dependent PGAM subfamily [a.k.a. PGAM1, XP_004020351.1, ENSOARG00000010049, W5PK04]	W5PK04_SHEEP Phosphoglycerate mutase OS=Ovis aries OX=9940 GN=PGAM1 PE=3 SV=1	W5PK04_SHEEP	27.9943	27.4082	27.4666	29.6199	29.0606	29.0596	2.67368e+08	1.7811e+08	1.85474e+08	8.2506e+08	5.59898e+08	5.59524e+08	3.08182
W5PIN6	W5PIN6	no known family	LDHA	LDHA - L-lactate dehydrogenase ; Belongs to the LDH/MDH superfamily [a.k.a. AF233079, L-lactate dehydrogenase, UPI00029D5423, W5PIN6]	W5PIN6_SHEEP Isoform of W5PIN4, L-lactate dehydrogenase OS=Ovis aries OX=9940 GN=LDHA PE=3 SV=1;tr	W5PIN6_SHEEP	27.8558	26.9816	27.2771	29.4955	28.3935	29.1003	2.42902e+08	1.32515e+08	1.6264e+08	7.56883e+08	3.52606e+08	5.7554e+08	3.13169
W5QFN9	W5QFN9		UGP2	UGP2 - UDP-glucose pyrophosphorylase 2 [a.k.a. 2.7.7.9, XM_004005844, W5QFN9]	W5QFN9_SHEEP UTP--glucose-1-phosphate uridylyltransferase OS=Ovis aries OX=9940 GN=UGP2 PE=3 SV=1	W5QFN9_SHEEP	25.8938	26.7191	25.4716	27.4239	27.6221	27.815	6.23472e+07	1.10475e+08	4.65297e+07	1.80065e+08	2.0657e+08	2.36135e+08	2.83913
W5PDE5	W5PDE5		ENSOARG00000007885	ENSOARG00000007885 - Uncharacterized protein [a.k.a. LOC101120001, XP_004013629.1, XM_004013580, W5PDE5]	W5PDE5_SHEEP Uncharacterized protein OS=Ovis aries OX=9940 GN=LOC101120001 PE=4 SV=1	W5PDE5_SHEEP	30.359	29.883	30.7163	32.2256	31.519	32.785	1.37707e+09	9.90114e+08	1.7641e+09	5.022e+09	3.07719e+09	7.40082e+09	3.75186
W5NXJ3	W5NXJ3		ENSOARG00000002722	ENSOARG00000002722 - Uncharacterized protein [a.k.a. LOC101112891, 101112891, oas:101112891, W5NXJ3]	W5NXJ3_SHEEP Uncharacterized protein OS=Ovis aries OX=9940 GN=LOC101112891 PE=4 SV=1	W5NXJ3_SHEEP	25.3593	26.6199	26.6985	28.1406	27.1105	28.2712	4.30432e+07	1.03128e+08	1.08904e+08	2.95915e+08	1.44902e+08	3.2395e+08	2.99819
W5Q691	W5Q691		ISOC1	ISOC1 - Isochorismatase domain containing 1 [a.k.a. UPI0003CD0C44, XP_012033564, isochorismatase domain containing 1, W5Q691]	W5Q691_SHEEP Uncharacterized protein OS=Ovis aries OX=9940 GN=ISOC1 PE=4 SV=1	W5Q691_SHEEP	26.4854	26.1054	24.7849	27.7554	27.201	27.2108	9.39484e+07	7.2195e+07	2.89065e+07	2.26579e+08	1.54281e+08	1.55331e+08	2.74899
W5Q0N0	W5Q0N0		PPIA	PPIA - Peptidyl-prolyl cis-trans isomerase; PPIases accelerate the folding of proteins. It catalyzes the cis-trans isomerization of proline imidic peptide bonds in oligopeptides [a.k.a. LOC101117753, LOC101119757, ENSOARG00000015163, W5Q0N0]	W5Q0N0_SHEEP Peptidyl-prolyl cis-trans isomerase OS=Ovis aries OX=9940 GN=LOC101119757 PE=3 SV=1;tr	W5Q0N0_SHEEP	28.3058	26.8023	27.1293	29.278	29.0245	29.0897	3.31807e+08	1.17029e+08	1.46801e+08	6.50985e+08	5.4607e+08	5.71308e+08	2.96886
W5P5H0	W5P5H0		COX7A1	COX7A1 - Cytochrome c oxidase subunit 7A1, mitochondrial; This protein is one of the nuclear-coded polypeptide chains of cytochrome c oxidase, the terminal oxidase in mitochondrial electron transport [a.k.a. LOC101121285, COX7AH, W5P5H0]	W5P5H0_SHEEP Cytochrome c oxidase subunit 7A1, mitochondrial OS=Ovis aries OX=9940 GN=COX7A1 PE=1 SV=1;sp	W5P5H0_SHEEP	26.5299	26.7469	26.5611	29.376	28.1558	27.3295	9.68963e+07	1.12619e+08	9.901e+07	6.96699e+08	2.99056e+08	1.6866e+08	3.77413
W5PP33	W5PP33		ENG	ENG - Endoglin [a.k.a. ENSOART00000012385, UPI00029D8660, XM_004005617, W5PP33]	W5PP33_SHEEP Uncharacterized protein OS=Ovis aries OX=9940 GN=ENG PE=4 SV=1	W5PP33_SHEEP	25.8814	24.7766	25.4168	26.8331	26.6537	27.4705	6.18121e+07	2.87414e+07	4.47926e+07	1.19554e+08	1.05577e+08	1.85972e+08	3.03743
W5Q6H1	W5Q6H1		PLS3	PLS3 - Plastin 3 [a.k.a. XM_004022407.1, W5Q6H1, UPI0000580F40]	W5Q6H1_SHEEP Uncharacterized protein OS=Ovis aries OX=9940 GN=PLS3 PE=4 SV=1	W5Q6H1_SHEEP	27.6003	27.0254	27.0872	29.1565	28.7262	29.1304	2.03484e+08	1.36597e+08	1.42583e+08	5.98369e+08	4.4407e+08	5.87655e+08	3.37729
W5PHX1	W5PHX1		ENSOARG00000009354	ENSOARG00000009354 - Adenosylhomocysteinase [a.k.a. LOC101112500, LOC101112245, ENSOART00000010183, W5PHX1]	W5PHX1_SHEEP Adenosylhomocysteinase OS=Ovis aries OX=9940 GN=LOC101112245 PE=3 SV=1;tr	W5PHX1_SHEEP	27.5291	27.8455	27.4023	29.6433	29.1544	29.4492	1.93684e+08	2.41172e+08	1.77385e+08	8.38542e+08	5.97517e+08	7.32966e+08	3.54276
W5P323	W5P323		GPI	GPI - Glucose-6-phosphate isomerase; Belongs to the GPI family [a.k.a. EC 5.3.1.9, NLK, XP_004015200, W5P323]	W5P323_SHEEP Glucose-6-phosphate isomerase OS=Ovis aries OX=9940 GN=GPI PE=3 SV=1	W5P323_SHEEP	28.6533	27.99	27.7288	30.4727	29.7369	29.7465	4.22198e+08	2.6658e+08	2.22435e+08	1.49e+09	8.94747e+08	9.00713e+08	3.60559
W5P3R3	W5P3R3		PLG	PLG - Plasminogen; Plasmin dissolves the fibrin of blood clots and acts as a proteolytic factor in a variety of other processes including embryonic development, tissue remodeling, tumor invasion, and inflammation. In ovulation, weakens the walls of the Graafian follicle. It activates the urokinase-type plasminogen activator, collagenases and several complement zymogens, such as C1 and C5. Cleavag…	W5P3R3_SHEEP Plasminogen OS=Ovis aries OX=9940 GN=PLG PE=3 SV=1;sp	W5P3R3_SHEEP	27.5595	29.5295	28.0427	30.3943	29.7845	30.5952	1.97806e+08	7.74961e+08	2.765e+08	1.41126e+09	9.2479e+08	1.62208e+09	3.16837
W5Q0L2	W5Q0L2		SERPINA5	SERPINA5 - Serpin family A member 5; Serpin peptidase inhibitor, clade A (alpha-1 antiproteinase, antitrypsin), member 5; Belongs to the serpin family [a.k.a. W5Q0L2, UPI0003CCDF69, AMGL01042990]	W5Q0L2_SHEEP Uncharacterized protein OS=Ovis aries OX=9940 GN=SERPINA5 PE=3 SV=1	W5Q0L2_SHEEP	25.738	25.7675	25.366	27.6254	27.397	26.9468	5.59638e+07	5.71202e+07	4.32444e+07	2.0705e+08	1.76728e+08	1.29358e+08	3.28242
W5Q5H8	W5Q5H8		FGA	FGA - Fibrinogen alpha chain; Cleaved by the protease thrombin to yield monomers which, together with fibrinogen beta (FGB) and fibrinogen gamma (FGG), polymerize to form an insoluble fibrin matrix. Fibrin has a major function in hemostasis as one of the primary components of blood clots. In addition, functions during the early stages of wound repair to stabilize the lesion and guide cell migrati…	W5Q5H8_SHEEP Fibrinogen alpha chain OS=Ovis aries OX=9940 GN=FGA PE=4 SV=1	W5Q5H8_SHEEP	28.9247	30.781	30.5411	32.9124	31.2019	32.2091	5.09576e+08	1.84501e+09	1.56233e+09	8.08381e+09	2.46998e+09	4.96489e+09	3.96196
W5PS88	W5PS88		GOT1	GOT1 - Aspartate aminotransferase; Glutamic-oxaloacetic transaminase 1, soluble [a.k.a. Aspartate aminotransferase, AMGL01063601, aspartate aminotransferase, cytoplasmic, W5PS88]	W5PS88_SHEEP Aspartate aminotransferase OS=Ovis aries OX=9940 GN=GOT1 PE=4 SV=1	W5PS88_SHEEP	28.6744	27.9823	27.2471	30.7379	30.1492	28.7043	4.28401e+08	2.65159e+08	1.59288e+08	1.79071e+09	1.19071e+09	4.37385e+08	4.00869
W5P6Q5	W5P6Q5		PFN1	PFN1 - Profilin 1; Belongs to the profilin family [a.k.a. Profilin, ENSOARG00000005695, ENSOARP00000006109, W5P6Q5]	W5P6Q5_SHEEP Profilin OS=Ovis aries OX=9940 GN=PFN1 PE=3 SV=1	W5P6Q5_SHEE	26.8844	25.8419	26.5242	28.0029	28.0707	28.6073	1.23884e+08	6.01415e+07	9.65107e+07	2.68971e+08	2.8191e+08	4.08944e+08	3.4214
W5QI04	W5QI04	no known family	TPM1	TPM1 - Uncharacterized protein; Ovis aries tropomyosin 1 (alpha) (TPM1), mRNA; Belongs to the tropomyosin family [a.k.a. ENSOART00000022658, AMGL01103098, UPI0003CCE866, W5QI04]	W5QI04_SHEEP Isoform of W5QI03, Uncharacterized protein OS=Ovis aries OX=9940 GN=TPM1 PE=3 SV=1	W5QI04_SHEEP	27.1803	24.8095	28.3617	28.8812	28.5608	28.4408	1.52085e+08	2.94037e+07	3.44921e+08	4.94438e+08	3.95964e+08	3.64372e+08	2.38365
W5Q9C5	W5Q9C5		LNPEP	LNPEP - Leucyl/cystinyl aminopeptidase [a.k.a. ENSOART00000019587, EC 3.4.11.3, AMGL01094773, W5Q9C5]	W5Q9C5_SHEEP Uncharacterized protein OS=Ovis aries OX=9940 GN=LNPEP PE=4 SV=1	W5Q9C5_SHEEP	23.9158	25.7815	24.2402	26.2013	26.8237	26.0147	1.58259e+07	5.76783e+07	1.98169e+07	7.71547e+07	1.1878e+08	6.7796e+07	2.82606
W5NQP9	W5NQP9		ALDOC	ALDOC - Aldolase C, fructose-bisphosphate [a.k.a. W5NQP9, XP_014954022, UPI0003CCDCC4]	W5NQP9_SHEEP Fructose-bisphosphate aldolase OS=Ovis aries OX=9940 GN=ALDOC PE=3 SV=1	W5NQP9_SHEEP	26.2062	27.1379	25.6938	29.0296	27.9068	27.773	7.74189e+07	1.47682e+08	5.42742e+07	5.48012e+08	2.51643e+08	2.29361e+08	3.68328
C4BPA	C4BPA	no known family	C4BPA	C4BPA - Complement component 4 binding protein, alpha	CON__Q28065	CON__Q28065	26.0212	26.0858	26.3657	28.2264	27.3918	28.5167	6.81024e+07	7.12209e+07	8.647e+07	3.14039e+08	1.76102e+08	3.84049e+08	3.87164
W5QAA3	W5QAA3		ENSOARG00000018303	ENSOARG00000018303 - Uncharacterized protein [a.k.a. LOC101114226, W5QAA3_SHEEP, AMGL01003669, W5QAA3]	W5QAA3_SHEEP Uncharacterized protein OS=Ovis aries OX=9940 GN=LOC101114226 PE=4 SV=1;tr	W5QAA3_SHEEP	26.541	25.4792	26.5747	28.1677	27.2392	28.8604	9.76435e+07	4.67729e+07	9.99501e+07	3.0153e+08	1.58418e+08	4.87351e+08	3.87655
W5NY95	W5NY95		C2	C2 - Complement factor B; Uncharacterized protein ; Belongs to the peptidase S1 family [a.k.a. CFB, A5YBU9, XM_004018929.1, W5NY95]	W5NY95_SHEEP Uncharacterized protein OS=Ovis aries OX=9940 GN=C2 PE=3 SV=1;tr	W5NY95_SHEEP	28.9548	27.6644	28.8276	30.5604	30.4155	30.782	5.20298e+08	2.12725e+08	4.76411e+08	1.5834e+09	1.4321e+09	1.84634e+09	4.01993
W5QB24	W5QB24		ENSOARG00000018551	ENSOARG00000018551 - Uncharacterized protein [a.k.a. ANP32A, W5QB24, oas:101105917]	W5QB24_SHEEP Uncharacterized protein OS=Ovis aries OX=9940 GN=ANP32A PE=4 SV=1;tr	W5QB24_SHEEP	24.2988	25.2709	24.5066	26.5713	26.5825	26.4143	2.06377e+07	4.04857e+07	2.38354e+07	9.97131e+07	1.00493e+08	8.94303e+07	3.40914
W5PK66	W5PK66		PARK7	PARK7 - Parkinsonism associated deglycase; Parkinson protein 7 [a.k.a. XM_004013749.1, XP_004013798, DJ1, W5PK66]	W5PK66_SHEEP Uncharacterized protein OS=Ovis aries OX=9940 GN=PARK7 PE=4 SV=1	W5PK66_SHEEP	27.8286	27.1241	26.3742	29.7906	28.9866	28.5798	2.38364e+08	1.46269e+08	8.69833e+07	9.28677e+08	5.31913e+08	4.01216e+08	3.94771
W5NVB2	W5NVB2		ENSOARG00000002008	ENSOARG00000002008 - Uncharacterized protein; Belongs to the serpin family [a.k.a. UPI0003CCE606, W5NVB2_SHEEP, XP_011963546, W5NVB2]	W5NVB2_SHEEP Uncharacterized protein OS=Ovis aries OX=9940 PE=3 SV=1	W5NVB2_SHEEP	26.0807	26.5578	26.0036	28.5594	28.3148	27.7708	7.09711e+07	9.87875e+07	6.72778e+07	3.95587e+08	3.33886e+08	2.28998e+08	4.04356
P79360	P79360	no known family	MAP	MAP-34 - Myeloid antimicrobial peptide; Uncharacterized protein [a.k.a. LOC101112427, UPI0000088984, W5NT47, P79360]	P79360_SHEEP Isoform of W5NT47, Myeloid antimicrobial peptide OS=Ovis aries OX=9940 GN=Map-34 PE=3 SV=1;tr	P79360_SHEEP	26.9196	28.3082	28.2199	29.743	29.7698	30.3754	1.26946e+08	3.32364e+08	3.12625e+08	8.98517e+08	9.15396e+08	1.39285e+09	4.15419
W5NXP6	W5NXP6		ENSOARG00000002771	ENSOARG00000002771 - Uncharacterized protein [a.k.a. LOC101111946, XM_004022910.1, ENSOARP00000002943, W5NXP6]	W5NXP6_SHEEP Uncharacterized protein OS=Ovis aries OX=9940 GN=LOC101111946 PE=4 SV=1	W5NXP6_SHEEP	25.3736	26.3435	26.5799	28.6805	28.1369	27.5494	4.34733e+07	8.51494e+07	1.00308e+08	4.3023e+08	2.95165e+08	1.96428e+08	4.02664
W5PTG9	W5PTG9	no known family	GC	GC - Group-specific component (vitamin D binding protein) [a.k.a. UPI0003CD0989, VDBP, GC-202, W5PTG9]	W5PTG9_SHEEP Isoform of W5PTH1, Uncharacterized protein OS=Ovis aries OX=9940 GN=GC PE=4 SV=1;tr	W5PTG9_SHEEP	28.1749	27.2518	27.187	29.9386	29.7367	29.402	3.03041e+08	1.59808e+08	1.52791e+08	1.02903e+09	8.94598e+08	7.09389e+08	4.27688
W5PJB6	W5PJB6		PGM1	PGM1 - Phosphoglucomutase 1; Belongs to the phosphohexose mutase family [a.k.a. ENSOART00000010693, XM_004002041, PGM1-201, W5PJB6]	W5PJB6_SHEEP Uncharacterized protein OS=Ovis aries OX=9940 GN=PGM1 PE=3 SV=1	W5PJB6_SHEEP	26.9139	27.3919	26.436	29.5095	28.7577	28.8349	1.2644e+08	1.76104e+08	9.07909e+07	7.64249e+08	4.53866e+08	4.78814e+08	4.31421
W5QD41	W5QD41		PSME2	PSME2 - Proteasome (prosome, macropain) activator subunit 2 (PA28 beta) [a.k.a. PSME2-201, ENSOARG00000019212, EU366495, W5QD41]	W5QD41_SHEEP Uncharacterized protein OS=Ovis aries OX=9940 GN=PSME2 PE=4 SV=1	W5QD41_SHEEP	26.5717	24.509	24.8299	27.7824	26.6613	27.5714	9.97451e+07	2.38744e+07	2.98229e+07	2.30852e+08	1.06137e+08	1.99446e+08	3.496
W5PPU0	W5PPU0		SPR	SPR - Sepiapterin reductase (7,8-dihydrobiopterin:NADP+ oxidoreductase) [a.k.a. sepiapterin reductase, W5PPU0, XM_004006069.1]	W5PPU0_SHEEP Uncharacterized protein OS=Ovis aries OX=9940 GN=SPR PE=4 SV=1	W5PPU0_SHEEP	23.9277	25.9941	24.5227	26.8252	27.0132	26.6347	1.59576e+07	6.68336e+07	2.41021e+07	1.18901e+08	1.3545e+08	1.04194e+08	3.35423
C4	C4	no known family	HOXC4	HOXC4 - Homeobox C4 [a.k.a. XP_014950095, Homeobox C4, ENSOART00000017721]	CON__P01030	CON__P01030	24.9549	26.9323	24.8486	27.6169	27.5791	27.8553	3.25207e+07	1.28062e+08	3.02119e+07	2.05834e+08	2.00516e+08	2.42825e+08	3.40248
W5NY01	W5NY01	no known family	CD163	CD163 - CD163 molecule [a.k.a. W5NY03_SHEEP, UPI0003CD1B11, CD163-201, W5NY01]	W5NY01_SHEEP Isoform of W5NY03, Uncharacterized protein OS=Ovis aries OX=9940 GN=CD163 PE=4 SV=1;tr	W5NY01_SHEEP	28.315	27.1298	28.7307	30.3499	29.5755	31.2561	3.33937e+08	1.46855e+08	4.45458e+08	1.36845e+09	8.00068e+08	2.56465e+09	5.11003
W5NRD4	W5NRD4		S100A1	S100A1 - S100 calcium binding protein A1; Belongs to the S-100 family [a.k.a. W5NRD4_SHEEP, XP_004002578.1, S100A1-201, W5NRD4]	W5NRD4_SHEEP Protein S100 OS=Ovis aries OX=9940 GN=S100A1 PE=3 SV=1	W5NRD4_SHEEP	28.0857	27.2584	26.6269	30.2907	28.8064	29.7519	2.84867e+08	1.60549e+08	1.03631e+08	1.31348e+09	4.69455e+08	9.04085e+08	4.89396
P83205	P83205		unknown	unknown	CATB_SHEEP Cathepsin B OS=Ovis aries OX=9940 GN=CTSB PE=1 SV=2	CATB_SHEEP	24.0078	23.5467	24.975	26.7627	25.7506	26.2542	1.68683e+07	1.22533e+07	3.29778e+07	1.13863e+08	5.64565e+07	8.00378e+07	4.03156
W5PLL2	W5PLL2		F9	F9 - Coagulation factor IX; Factor IX is a vitamin K-dependent plasma protein that participates in the intrinsic pathway of blood coagulation by converting factor X to its active form in the presence of Ca(2+) ions, phospholipids, and factor VIIIa [a.k.a. F9-202, ENSOARG00000010560, ENSOART00000011493, W5PLL2]	W5PLL2_SHEEP Coagulation factor IX OS=Ovis aries OX=9940 GN=F9 PE=3 SV=1;tr	W5PLL2_SHEEP	23.7966	25.3167	24.8698	27.0438	27.4625	25.8465	1.45714e+07	4.17905e+07	3.06586e+07	1.38353e+08	1.84943e+08	6.03359e+07	4.40853
W5P3I5	W5P3I5		CNDP2	CNDP2 - CNDP dipeptidase 2 (metallopeptidase M20 family) [a.k.a. CN2, XP_014959057, oas:101111244, W5P3I5]	W5P3I5_SHEEP Uncharacterized protein OS=Ovis aries OX=9940 GN=CNDP2 PE=4 SV=1	W5P3I5_SHEEP	23.362	23.6423	22.9951	25.9872	24.0379	26.0073	1.07811e+07	1.3093e+07	8.36005e+06	6.65162e+07	1.72232e+07	6.74495e+07	4.69033
W5PNV3	W5PNV3		AK1	AK1 - Uncharacterized protein; Ovis aries adenylate kinase 1 (AK1), mRNA; Belongs to the adenylate kinase family [a.k.a. AMGL01074845, UPI0003CD1C0C, NP_001155354.1, W5PNV3]	W5PNV3_SHEEP Uncharacterized protein OS=Ovis aries OX=9940 GN=AK1 PE=3 SV=1	W5PNV3_SHEEP	23.2877	22.2875	24.8654	25.2951	25.5846	25.742	1.02401e+07	5.1193e+06	3.05661e+07	4.11709e+07	5.03204e+07	5.61215e+07	3.21418
P54230	P54230		DODEA	DODEA - Cathelicidin-1; Potent microbicidal activity; active against S.aureus and E.coli [a.k.a. LOC101112681, CATHL1A, DODEB, P54230]	CTHL1_SHEEP Cathelicidin-1 OS=Ovis aries OX=9940 GN=CATHL1B PE=2 SV=1;tr	CTHL1_SHEEP	27.3902	26.6875	27.7902	29.3568	30.0337	29.7959	1.75907e+08	1.08081e+08	2.32106e+08	6.87519e+08	1.09909e+09	9.32092e+08	5.26784
Q9XT27	Q9XT27		CP	CP - Ceruloplasmin; Ceruloplasmin is a blue, copper-binding (6-7 atoms per molecule) glycoprotein. It has ferroxidase activity oxidizing Fe(2+) to Fe(3+) without releasing radical oxygen species. It is involved in iron transport across the cell membrane (By similarity) [a.k.a. Ceruloplasmin, UPI0003CCDB37, ENSOARG00000005049, Q9XT27]	CERU_SHEEP Ceruloplasmin OS=Ovis aries OX=9940 GN=CP PE=2 SV=1	CERU_SHEEP	28.5133	28.2901	28.9548	31.5356	30.8271	31.0876	3.83146e+08	3.28212e+08	5.20316e+08	3.11287e+09	1.90497e+09	2.28189e+09	5.92668
W5PR44	W5PR44		NDUFAF4	NDUFAF4 - Uncharacterized protein [a.k.a. LOC101111245, oas:101105508, AMGL01106960, W5PR44]	W5PR44_SHEEP Uncharacterized protein OS=Ovis aries OX=9940 GN=NDUFAF4 PE=4 SV=1	W5PR44_SHEEP	24.1136	24.4689	23.7282	25.4742	27.1241	26.2963	1.81515e+07	2.32207e+07	1.38961e+07	4.66118e+07	1.46274e+08	8.24101e+07	4.98109
W5QJA2	W5QJA2		CD14	CD14 - Monocyte differentiation antigen CD14; Coreceptor for bacterial lipopolysaccharide. In concert with LBP, binds to monomeric lipopolysaccharide and delivers it to the LY96/TLR4 complex, thereby mediating the innate immune response to bacterial lipopolysaccharide (LPS). Acts via MyD88, TIRAP and TRAF6, leading to NF-kappa-B activation, cytokine secretion and the inflammatory response. Acts a…	W5QJA2_SHEEP Monocyte differentiation antigen CD14 OS=Ovis aries OX=9940 GN=CD14 PE=4 SV=1	W5QJA2_SHEEP	25.4459	25.3814	25.3857	27.8236	26.6615	28.7463	4.57068e+07	4.37068e+07	4.38394e+07	2.37545e+08	1.06151e+08	4.50289e+08	5.95848
W5PC00	W5PC00		AKR1B1	AKR1B1 - Uncharacterized protein [a.k.a. EC 1.1.1.21, ENSOART00000008078, AMGL01089148, W5PC00]	W5PC00_SHEEP Uncharacterized protein OS=Ovis aries OX=9940 GN=AKR1B1 PE=4 SV=1	W5PC00_SHEEP	25.2889	25.9266	23.882	27.5283	27.8711	26.8322	4.0994e+07	6.37795e+07	1.54592e+07	1.93575e+08	2.45492e+08	1.19483e+08	4.64558
W5PR48	W5PR48		ENSOARG00000012055	ENSOARG00000012055 - Hypoxanthine phosphoribosyltransferase; Belongs to the purine/pyrimidine phosphoribosyltransferase family [a.k.a. HPRT1, W5PR48, XP_014960509]	W5PR48_SHEEP Hypoxanthine phosphoribosyltransferase OS=Ovis aries OX=9940 GN=HPRT1 PE=3 SV=1;tr	W5PR48_SHEEP	23.051	22.8358	22.8808	26.2844	23.1019	25.919	8.69049e+06	7.48597e+06	7.7236e+06	8.17345e+07	9.00263e+06	6.34446e+07	6.4511
W5PLB7	W5PLB7		PGLYRP1	PGLYRP1 - Peptidoglycan-recognition protein; Pattern receptor that binds to murein peptidoglycans (PGN) of Gram-positive bacteria. May kill Gram-positive bacteria by interfering with peptidoglycan biosynthesis. Involved in innate immunity [a.k.a. PGRP-S, ENSOARP00000011240, oas:101115395, W5PLB7]	W5PLB7_SHEEP Peptidoglycan-recognition protein OS=Ovis aries OX=9940 GN=PGLYRP1 PE=3 SV=1	W5PLB7_SHEEP	26.1872	26.1766	25.9548	28.6052	28.7787	28.4978	7.64072e+07	7.58502e+07	6.50403e+07	4.08339e+08	4.60524e+08	3.7906e+08	5.74291
W5PDL1	W5PDL1		WDR1	WDR1 - WD repeat domain 1 [a.k.a. WD repeat-containing protein 1 isoform X1, UPI0003CCFEAF, AMGL01100191, W5PDL1]	W5PDL1_SHEEP Uncharacterized protein OS=Ovis aries OX=9940 GN=WDR1 PE=4 SV=1	W5PDL1_SHEEP	26.1293	23.9085	23.8575	27.1408	27.6385	26.3133	7.34037e+07	1.57457e+07	1.51995e+07	1.47978e+08	2.08933e+08	8.33862e+07	4.21947
W5QAN8	W5QAN8		CFH	CFH - Uncharacterized protein [a.k.a. W5QAN8_SHEEP, XP_011963469, ENSOARP00000019783, W5QAN8]	W5QAN8_SHEEP Uncharacterized protein OS=Ovis aries OX=9940 GN=CFH PE=4 SV=1	W5QAN8_SHEEP	24.8446	24.9598	25.1689	27.4875	27.284	27.5928	3.01277e+07	3.26326e+07	3.77216e+07	1.88175e+08	1.63421e+08	2.02423e+08	5.51362
W5P214	W5P214		TAGLN	TAGLN - Transgelin; Belongs to the calponin family [a.k.a. TAGLN-201, TAGLN1, ENSOARP00000004463, W5P214]	W5P214_SHEEP Transgelin OS=Ovis aries OX=9940 GN=TAGLN PE=3 SV=1	W5P214_SHEEP	26.1941	24.955	23.5195	27.89	27.1695	27.3232	7.67719e+07	3.2525e+07	1.20247e+07	2.48734e+08	1.50948e+08	1.67924e+08	4.67853
W5P2A9	W5P2A9		ME3	ME3 - Malic enzyme 3, NADP(+)-dependent, mitochondrial [a.k.a. EC 1.1.1.40, 101102434, oas:101102434, W5P2A9]	W5P2A9_SHEEP Malic enzyme OS=Ovis aries OX=9940 GN=ME3 PE=3 SV=1	W5P2A9_SHEEP	22.2417	25.6877	23.4003	26.3332	26.5975	25.8411	4.95931e+06	5.40463e+07	1.10715e+07	8.45421e+07	1.01544e+08	6.01108e+07	3.51323
W5P7G4	W5P7G4		TNC	TNC - Tenascin C [a.k.a. HXB, XP_011967561, AMGL01047070, W5P7G4]	W5P7G4_SHEEP Uncharacterized protein OS=Ovis aries OX=9940 GN=TNC PE=4 SV=1	W5P7G4_SHEEP	26.8617	26.6133	27.2515	30.5778	28.6657	29.9635	1.21951e+08	1.02663e+08	1.59775e+08	1.60258e+09	4.25836e+08	1.04692e+09	8.00056
W5PYS8	W5PYS8		ENSOARG00000014548	ENSOARG00000014548 - Uncharacterized protein [a.k.a. LOC101115706, W5PYS8, ENSOARP00000015614]	W5PYS8_SHEEP Uncharacterized protein OS=Ovis aries OX=9940 PE=4 SV=1	W5PYS8_SHEEP	23.0679	23.4287	24.3877	25.6591	25.4909	27.3473	8.79276e+06	1.12912e+07	2.195e+07	5.29853e+07	4.7155e+07	1.70745e+08	6.44443
W5QDG8	W5QDG8	no known family	FN1	FN1 - Fibronectin 1 [a.k.a. XP_004004956.1, FN1-201, MSF, W5QDG8]	W5QDG8_SHEEP Isoform of W5QDG7, Uncharacterized protein OS=Ovis aries OX=9940 GN=FN1 PE=4 SV=1;tr	W5QDG8_SHEEP	26.9069	26.8508	27.8062	31.4571	29.1206	30.2823	1.25826e+08	1.21034e+08	2.34693e+08	2.94803e+09	5.83665e+08	1.30582e+09	10.0457
W5Q124	W5Q124		ENSOARG00000015292	ENSOARG00000015292 - Uncharacterized protein; Belongs to the serpin family [a.k.a. LOC101119509, XP_011954394.1, UPI00029D89AD, W5Q124]	W5Q124_SHEEP Uncharacterized protein OS=Ovis aries OX=9940 GN=LOC101119509 PE=3 SV=1	W5Q124_SHEEP	28.6134	27.792	27.37	31.4712	31.3469	30.8657	4.10664e+08	2.32396e+08	1.73455e+08	2.97694e+09	2.73113e+09	1.9566e+09	9.38706
W5Q0X5	W5Q0X5		ENSOARG00000015253	ENSOARG00000015253 - Uncharacterized protein; Belongs to the serpin family [a.k.a. LOC101115576, XP_004018190.1, XM_004018141.1, W5Q0X5]	W5Q0X5_SHEEP Uncharacterized protein OS=Ovis aries OX=9940 GN=LOC101115576 PE=3 SV=1	W5Q0X5_SHEEP	27.4973	26.913	26.318	30.4726	30.0541	30.0592	1.89462e+08	1.26365e+08	8.36553e+07	1.48993e+09	1.11474e+09	1.1187e+09	9.32048
W5Q3F9	W5Q3F9		AOX1	AOX1 - Aldehyde oxidase 1 [a.k.a. LOC101104557, AO, Aldehyde oxidase 1, W5Q3F9]	W5Q3F9_SHEEP Uncharacterized protein OS=Ovis aries OX=9940 GN=AOX1 PE=4 SV=1	W5Q3F9_SHEEP	25.7755	22.8482	25.1218	28.195	27.1222	27.5346	5.74362e+07	7.551e+06	3.65097e+07	3.07285e+08	1.4608e+08	1.94426e+08	6.38237
W5PHI7	W5PHI7		ENSOARG00000009231	ENSOARG00000009231 - Uncharacterized protein; Belongs to the serpin family [a.k.a. LOC101116892, XP_011963751, UPI0003CCECDA, W5PHI7]	W5PHI7_SHEEP Uncharacterized protein OS=Ovis aries OX=9940 GN=LOC101116892 PE=3 SV=1	W5PHI7_SHEEP	25.7632	25.74	25.2888	30.0222	29.1232	28.0402	5.69497e+07	5.6041e+07	4.09909e+07	1.09039e+09	5.84731e+08	2.76028e+08	12.6713
W5PMH6	W5PMH6		LCN2	LCN2 - Lipocalin 2 [a.k.a. XP_004005657, XP_014949653, Lipocalin 2, W5PMH6]	W5PMH6_SHEEP Uncharacterized protein OS=Ovis aries OX=9940 GN=LCN2 PE=3 SV=1	W5PMH6_SHEEP	24.4187	24.4281	25.4946	28.7231	28.0612	28.4497	2.24263e+07	2.25739e+07	4.72749e+07	4.43114e+08	2.80069e+08	3.66623e+08	11.8104
W5PHP7	W5PHP7		ENSOARG00000009286	ENSOARG00000009286 - Uncharacterized protein; Belongs to the serpin family [a.k.a. LOC101117146, XP_011963749, XP_004023158, W5PHP7]	W5PHP7_SHEEP Uncharacterized protein OS=Ovis aries OX=9940 PE=3 SV=1	W5PHP7_SHEEP	25.1186	24.7276	25.2333	29.2933	29.3029	28.3299	3.64299e+07	2.77819e+07	3.94428e+07	6.57907e+08	6.62293e+08	3.37414e+08	15.9917
W5P0Q4	W5P0Q4		HP	HP - Uncharacterized protein; Belongs to the peptidase S1 family [a.k.a. LOC101102413, oas:101102413, XP_004015160, W5P0Q4]	W5P0Q4_SHEEP Uncharacterized protein OS=Ovis aries OX=9940 GN=LOC101102413 PE=3 SV=1	W5P0Q4_SHEEP	28.9716	28.7427	29.194	34.7894	34.0345	34.2349	5.26402e+08	4.49169e+08	6.14157e+08	2.9693e+10	1.7596e+10	2.02175e+10	42.4641
W5PJG0	W5PJG0		ENSOARG00000009865	ENSOARG00000009865 - Serum amyloid A protein; Major acute phase reactant. Apolipoprotein of the HDL complex [a.k.a. LOC105601867, AMGL01061210, 105601867, W5PJG0]	W5PJG0_SHEEP Serum amyloid A protein OS=Ovis aries OX=9940 GN=LOC105601867 PE=3 SV=1	W5PJG0_SHEEP	24.8705	23.6448	24.7205	28.6641	28.8207	30.2622	3.06737e+07	1.31154e+07	2.7645e+07	4.25345e+08	4.74129e+08	1.28777e+09	30.6191
W5NRG7	W5NRG7		ITIH4	ITIH4 - Inter-alpha-trypsin inhibitor heavy chain family, member 4 [a.k.a. ITIHL1, XP_004018440.1, H4P, W5NRG7]	W5NRG7_SHEEP Uncharacterized protein OS=Ovis aries OX=9940 GN=ITIH4 PE=4 SV=1	W5NRG7_SHEEP	25.9672	26.9687	26.8619	33.1276	32.7371	32.9338	6.55983e+07	1.31335e+08	1.21968e+08	9.38407e+09	7.15902e+09	8.2044e+09	77.6024
W5Q7J0	W5Q7J0		APOB	APOB - Apolipoprotein B [a.k.a. XP_012031328, Oar.11829, XM_004007218, W5Q7J0]	W5Q7J0_SHEEP Uncharacterized protein OS=Ovis aries OX=9940 GN=APOB PE=4 SV=1	W5Q7J0_SHEEP	21.9634	24.6563	22.9321	30.377	28.1763	29.228	4.08919e+06	2.6441e+07	8.00318e+06	1.39437e+09	3.03336e+08	6.28783e+08	60.3761
W5QBW5	W5QBW5		LBP	LBP - Lipopolysaccharide binding protein [a.k.a. lipopolysaccharide-binding protein, ENSOART00000020492, ENSOARG00000018816, W5QBW5]	W5QBW5_SHEEP Uncharacterized protein OS=Ovis aries OX=9940 GN=LBP PE=4 SV=1	W5QBW5_SHEEP	23.2026	23.2004	23.7353	31.1872	31.2148	31.1622	9.65356e+06	9.63845e+06	1.39648e+07	2.44508e+09	2.4922e+09	2.40294e+09	220.713

## Sheet: Sheet B - Families
Mapped IDs	Mapped IDs	Family ID	Family Name	PANTHER GO-Slim Molecular Function	PANTHER GO-Slim Biological Process	PANTHER GO-Slim Cellular Component	PANTHER Protein Class	Interpro
P00349	P00349	PTHR11811:SF59	6-PHOSPHOGLUCONATE DEHYDROGENASE, DECARBOXYLATING 2, CHLOROPLASTIC	nucleotide binding	carboxylic acid catabolic process	cytosol	dehydrogenase
P02075	P02075	PTHR11442:SF90	HEMOGLOBIN SUBUNIT DELTA	protein binding	reactive oxygen species metabolic process	extracellular space	-
P32262	P32262	PTHR11461:SF159	PLASMA PROTEASE C1 INHIBITOR	endopeptidase inhibitor activity	proteolysis	extracellular space	protease inhibitor
P50751	P50751	PTHR11521:SF1	TROPONIN T, SKELETAL MUSCLE	calcium ion binding	skeletal muscle contraction	cytoskeletal part	actin binding motor protein
P54230	P54230	PTHR10206:SF2	CATHELICIDIN ANTIMICROBIAL PEPTIDE	-	-	-	antimicrobial response protein
P62896	P62896	PTHR11961:SF7	CYTOCHROME C 2.2-RELATED	-	positive regulation of cysteine-type endopeptidase activity involved in apoptotic process	mitochondrial intermembrane space	-
P83205	P83205	PTHR12411:SF615	SUBFAMILY NOT NAMED	cysteine-type endopeptidase activity	proteolysis involved in cellular protein catabolic process	extracellular space	cysteine protease
Q2TCH3	Q2TCH3	PTHR23118:SF36	ATP-CITRATE SYNTHASE ALPHA CHAIN PROTEIN 1-RELATED	-	-	-	transferase
Q6B3Y2	Q6B3Y2	PTHR10844:SF19	CAVEOLIN-2	molecular adaptor activity	lipid transport	integral component of plasma membrane	scaffold/adaptor protein
Q9MZA9	Q9MZA9	PTHR45652:SF2	DESMIN	-	-	-	-
Q9XSM2	Q9XSM2	PTHR24271:SF82	SI:CH211-212D10.1	-	-	-	serine protease
Q9XT27	Q9XT27	PTHR11709:SF414	SUBFAMILY NOT NAMED	oxidoreductase activity	-	-	oxidase
W5NQP9	W5NQP9	PTHR11627:SF8	FRUCTOSE-BISPHOSPHATE ALDOLASE 3, CHLOROPLASTIC	fructose-bisphosphate aldolase activity	glycolytic process	cytosol	-
W5NR63	W5NR63	PTHR11639:SF134	PROTEIN S100-B-RELATED	-	-	-	calmodulin-related
W5NRD4	W5NRD4	PTHR11639:SF59	PROTEIN S100-A2	-	-	-	calmodulin-related
W5NRG7	W5NRG7	PTHR10166	VOLTAGE-DEPENDENT CALCIUM CHANNEL SUBUNIT ALPHA-2/DELTA-RELATED	-	-	-	-
W5NRH5	W5NRH5	PTHR44375:SF21	BNAA02G04430D PROTEIN	-	-	-	-
W5NRI1	W5NRI1	PTHR11412:SF140	ALPHA-2-MACROGLOBULIN-LIKE PROTEIN 1	endopeptidase inhibitor activity	-	-	protease inhibitor
W5NRW4	W5NRW4	PTHR19269:SF53	TROPOMYOSIN-2	actin filament binding	muscle contraction	actin filament	actin binding motor protein
W5NS44	W5NS44	PTHR44115:SF1	PROTEIN CBG09690	-	-	-	-
W5NS65	W5NS65	PTHR11467:SF57	HISTONE H1.4	chromatin DNA binding	nucleosome organization	nuclear chromatin	histone
W5NSP2	W5NSP2	PTHR10394:SF22	40S RIBOSOMAL PROTEIN S8	structural constituent of ribosome	maturation of SSU-rRNA from tricistronic rRNA transcript (SSU-rRNA, 5.8S rRNA, LSU-rRNA)	cytosolic small ribosomal subunit	ribosomal protein
W5NT24	W5NT24	PTHR46957:SF3	CYTOKINE RECEPTOR	-	-	-	-
W5NTE7	W5NTE7	PTHR11655	60S/50S RIBOSOMAL PROTEIN L6/L9	structural constituent of ribosome	cytoplasmic translation	-	ribosomal protein
W5NTS5	W5NTS5	PTHR43851:SF6	SI:DKEY-36G24.3	kinase activity	ubiquinone biosynthetic process	mitochondrial membrane part	-
W5NU76	W5NU76	PTHR45842:SF1	SUBFAMILY NOT NAMED	-	-	integral component of postsynaptic density membrane	-
W5NUL7	W5NUL7	PTHR23077:SF162	BNAA01G32030D PROTEIN	polyubiquitin modification-dependent protein binding	autophagosome maturation	endoplasmic reticulum membrane	-
W5NUQ4	W5NUQ4	PTHR13738:SF18	TROPONIN I 2	-	muscle contraction	cytoskeletal part	non-motor actin binding protein
W5NV70	W5NV70	PTHR16485	MICROFIBRILLAR-ASSOCIATED PROTEIN 2	-	-	-	-
W5NVB2	W5NVB2	PTHR11461:SF53	ANTITHROMBIN-III	endopeptidase inhibitor activity	proteolysis	extracellular space	protease inhibitor
W5NWF7	W5NWF7	PTHR23115:SF191	ELONGATION FACTOR 1-ALPHA	translation regulator activity	translational elongation	-	translation factor
W5NWM5	W5NWM5	PTHR42760:SF99	3-OXOACYL-[ACYL-CARRIER-PROTEIN] REDUCTASE 4-LIKE	oxidoreductase activity, acting on the CH-OH group of donors, NAD or NADP as acceptor	oxidation-reduction process	-	oxidoreductase
W5NX51	W5NX51	PTHR18976	APOLIPOPROTEIN	-	-	-	-
W5NXC0	W5NXC0	PTHR48083:SF6	ZGC:85777	-	-	-	-
W5NXJ3	W5NXJ3	PTHR11412:SF150	ALPHA-2-MACROGLOBULIN	-	-	-	protease inhibitor
W5NXP6	W5NXP6	PTHR11412:SF81	COMPLEMENT C3	-	-	-	protease inhibitor
W5NY29	W5NY29	PTHR10994:SF140	RETICULON-LIKE PROTEIN	-	-	-	membrane traffic protein
W5NY95	W5NY95	PTHR24276:SF91	FI18310P1	-	-	-	serine protease
W5NYQ9	W5NYQ9	PTHR10721	MITOCHONDRIAL IMPORT INNER MEMBRANE TRANSLOCASE SUBUNIT TIM44	chaperone binding	protein import into mitochondrial matrix	mitochondrial inner membrane	transporter
W5NZ80	W5NZ80	PTHR14392:SF3	PROTEIN NIBAN	-	-	-	-
W5NZ87	W5NZ87	PTHR10404:SF26	TRANSFERRIN RECEPTOR PROTEIN 1	carboxypeptidase activity	cellular iron ion homeostasis	leaflet of membrane bilayer	metalloprotease
W5NZR9	W5NZR9	PTHR23070:SF185	BNAC09G09700D PROTEIN	-	-	-	-
W5NZX9	W5NZX9	PTHR19961:SF73	DYSTROPHIN	actin filament binding	actin filament bundle assembly	cytoplasm	non-motor actin binding protein
W5P094	W5P094	PTHR24039	FIBRILLIN-RELATED	-	-	-	extracellular matrix structural protein
W5P0Q4	W5P0Q4	PTHR24264:SF40	HYALURONAN-BINDING PROTEIN 2	serine-type endopeptidase activity	proteolysis	extracellular space	serine protease
W5P0T6	W5P0T6	PTHR12147	METALLOPEPTIDASE M28 FAMILY MEMBER	-	proteolysis	-	metalloprotease
W5P1S3	W5P1S3	PTHR45683:SF12	BNAA09G07970D PROTEIN	carboxylic acid transmembrane transporter activity	-	-	-
W5P1S6	W5P1S6	PTHR21049:SF0	DOLICHYL-DIPHOSPHOOLIGOSACCHARIDE--PROTEIN GLYCOSYLTRANSFERASE SUBUNIT 1	oligosaccharyl transferase activity	peptidyl-amino acid modification	oligosaccharyltransferase complex	glycosyltransferase
W5P1X9	W5P1X9	PTHR11627:SF74	FRUCTOSE-BISPHOSPHATE ALDOLASE	fructose-bisphosphate aldolase activity	glycolytic process	cytosol	-
W5P214	W5P214	PTHR46756:SF11	CALPONIN	-	-	-	-
W5P2A5	W5P2A5	PTHR42981	PYRUVATE DEHYDROGENASE [UBIQUINONE]	-	-	-	-
W5P2A9	W5P2A9	PTHR23406:SF74	MALIC ENZYME	oxidoreductase activity, acting on the CH-OH group of donors, NAD or NADP as acceptor	monocarboxylic acid metabolic process	chloroplast	oxidoreductase
W5P323	W5P323	PTHR11469:SF1	GLUCOSE-6-PHOSPHATE ISOMERASE	intramolecular transferase activity	glucose 6-phosphate metabolic process	cytosol	isomerase
W5P3I5	W5P3I5	PTHR43270:SF3	PEPTIDASE-RELATED	hydrolase activity, acting on carbon-nitrogen (but not peptide) bonds, in linear amides	-	cytosol	metalloprotease
W5P3R3	W5P3R3	PTHR24276:SF90	CHYMOTRYPSIN-LIKE PROTEINASE 5B	serine-type endopeptidase activity	-	-	serine protease
W5P4C0	W5P4C0	PTHR11885:SF16	OS07G0572900 PROTEIN	structural constituent of ribosome	-	cytosolic small ribosomal subunit	ribosomal protein
W5P4I6	W5P4I6	PTHR24034:SF137	SI:DKEY-163F14.6	-	cellular component assembly	-	extracellular matrix structural protein
W5P500	W5P500	PTHR11599:SF163	PROTEASOME SUBUNIT BETA	endopeptidase activity	proteasome-mediated ubiquitin-dependent protein catabolic process	nucleus	-
W5P5A0	W5P5A0	PTHR47535:SF6	SI:CH211-207I1.2	actin filament binding	maintenance of location	membrane protein complex	-
W5P5H0	W5P5H0	PTHR10510:SF16	CYTOCHROME C OXIDASE SUBUNIT 7A1	-	oxidative phosphorylation	mitochondrial respirasome	oxidase
W5P5Q1	W5P5Q1	PTHR46912:SF1	HIGH MOBILITY GROUP B PROTEIN 13	-	-	-	-
W5P5W9	W5P5W9	PTHR21139:SF25	SENESCENCE MARKER PROTEIN-30 (SMP-30)	isomerase activity	small molecule biosynthetic process	cytosol	isomerase
W5P6F4	W5P6F4	PTHR11412:SF162	CD109 ANTIGEN	-	-	-	protease inhibitor
W5P6Q5	W5P6Q5	PTHR13936:SF5	PROFILIN	actin binding	positive regulation of supramolecular fiber organization	cytoplasm	non-motor actin binding protein
W5P7G4	W5P7G4	PTHR24044:SF438	NEUROGENIC LOCUS PROTEIN DELTA-RELATED	signaling receptor binding	-	-	-
W5P8W6	W5P8W6	PTHR24020:SF29	COLLAGEN ALPHA-2(VI) CHAIN	-	tissue morphogenesis	extracellular space	extracellular matrix structural protein
W5P8X9	W5P8X9	PTHR43920:SF2	CHLORIDE INTRACELLULAR CHANNEL PROTEIN 1	chloride channel activity	-	nucleus	-
W5P994	W5P994	PTHR10046:SF65	LON PROTEASE	-	-	-	serine protease
W5PB83	W5PB83	PTHR11680:SF44	SERINE HYDROXYMETHYLTRANSFERASE	zinc ion binding	response to acid chemical	-	methyltransferase
W5PBG4	W5PBG4	PTHR13462	CALCIUM UNIPORTER PROTEIN, MITOCHONDRIAL	secondary active transmembrane transporter activity	transmembrane transport	-	-
W5PBP1	W5PBP1	PTHR11759:SF40	OS02G0162500 PROTEIN	structural constituent of ribosome	maturation of SSU-rRNA from tricistronic rRNA transcript (SSU-rRNA, 5.8S rRNA, LSU-rRNA)	cytosolic small ribosomal subunit	ribosomal protein
W5PC00	W5PC00	PTHR11732:SF383	ALDO-KETO REDUCTASE FAMILY 1 MEMBER C15	oxidoreductase activity, acting on the CH-OH group of donors, NAD or NADP as acceptor	steroid metabolic process	cytosol	reductase
W5PC25	W5PC25	PTHR11260:SF524	GLUTATHIONE S-TRANSFERASE	transferase activity, transferring alkyl or aryl (other than methyl) groups	glutathione metabolic process	cytoplasm	-
W5PDE5	W5PDE5	PTHR19325:SF505	COMPLEMENT RECEPTOR TYPE 1	-	-	-	-
W5PDG3	W5PDG3	PTHR10836:SF89	SUBFAMILY NOT NAMED	-	-	-	dehydrogenase
W5PDL1	W5PDL1	PTHR19879:SF6	TAF5-LIKE RNA POLYMERASE II P300/CBP-ASSOCIATED FACTOR-ASSOCIATED FACTOR 65 KDA SUBUNIT 5L	-	-	-	-
W5PDS4	W5PDS4	PTHR24637:SF339	CUTICLE COLLAGEN 79-RELATED	-	-	-	-
W5PE27	W5PE27	PTHR43037:SF1	UNNAMED PRODUCT	-	-	-	-
W5PE53	W5PE53	PTHR45742:SF1	COMPLEMENT COMPONENT C8 ALPHA CHAIN	-	-	-	-
W5PEC5	W5PEC5	PTHR21049	RIBOPHORIN I	oligosaccharyl transferase activity	peptidyl-amino acid modification	oligosaccharyltransferase complex	glycosyltransferase
W5PEE7	W5PEE7	PTHR47992:SF72	PHOSPHATASE 2C FAMILY PROTEIN	-	-	-	-
W5PEP0	W5PEP0	PTHR12114	PARVIN	actin binding	cell projection assembly	focal adhesion	actin and actin related protein
W5PEV6	W5PEV6	PTHR11710:SF21	SUBFAMILY NOT NAMED	RNA binding	organelle assembly	cytosolic small ribosomal subunit	ribosomal protein
W5PF02	W5PF02	PTHR45909	ADP-RIBOSYLATION FACTOR-RELATED PROTEIN 1	-	Golgi to plasma membrane protein transport	Golgi apparatus	-
W5PF65	W5PF65	PTHR11485	TRANSFERRIN	-	-	-	transfer/carrier protein
W5PG09	W5PG09	PTHR11406:SF13	PHOSPHOGLYCERATE KINASE	ATP binding	positive regulation of phosphorylation	cytosol	carbohydrate kinase
W5PG71	W5PG71	PTHR47958:SF79	BNAA06G38640D PROTEIN	-	mRNA splicing, via spliceosome	spliceosomal complex	-
W5PGK1	W5PGK1	PTHR24209:SF7	PROTEIN DA1-RELATED 2	-	-	-	actin or actin-binding cytoskeletal protein
W5PGR8	W5PGR8	PTHR10697:SF1	MAMMALIAN EPENDYMIN-RELATED PROTEIN 1	-	-	-	-
W5PGT6	W5PGT6	PTHR46096:SF5	PERFORIN 1.2-RELATED	-	-	-	-
W5PH02	W5PH02	PTHR24093:SF484	CALCIUM-TRANSPORTING ATPASE	ATPase activity	-	integral component of plasma membrane	primary active transporter
W5PH55	W5PH55	PTHR11258:SF21	SUBFAMILY NOT NAMED	double-stranded RNA binding	RNA phosphodiester bond hydrolysis	cytosol	nucleotidyltransferase
W5PHF2	W5PHF2	PTHR42803:SF1	DEHYDROGENASE, PUTATIVE-RELATED	-	-	-	dehydrogenase
W5PHI7	W5PHI7	PTHR11461:SF199	SERPIN B11	endopeptidase inhibitor activity	proteolysis	extracellular space	protease inhibitor
W5PHI8	W5PHI8	PTHR15040:SF3	SI:DKEY-14D8.6-RELATED	-	collagen fibril organization	extracellular space	cell adhesion molecule
W5PHP7	W5PHP7	PTHR11461:SF345	SUBFAMILY NOT NAMED	endopeptidase inhibitor activity	proteolysis	extracellular space	protease inhibitor
W5PHX1	W5PHX1	PTHR23420:SF20	ADENOSYLHOMOCYSTEINASE	hydrolase activity	sulfur compound metabolic process	cytosol	hydrolase
W5PI17	W5PI17	PTHR16675:SF172	HEREDITARY HEMOCHROMATOSIS PROTEIN	-	-	-	-
W5PJ14	W5PJ14	PTHR47042	C2 DOMAIN-CONTAINING PROTEIN-LIKE	-	-	-	-
W5PJ75	W5PJ75	PTHR23167:SF22	ALPHA-ACTININ-2	-	-	-	-
W5PJB6	W5PJB6	PTHR22573:SF57	PHOSPHOGLUCOMUTASE	intramolecular transferase activity	glycogen biosynthetic process	cytosol	-
W5PJG0	W5PJG0	PTHR23424	SERUM AMYLOID A	-	-	-	apolipoprotein
W5PK04	W5PK04	PTHR48100:SF12	PHOSPHOGLYCERATE MUTASE	-	-	-	-
W5PK54	W5PK54	PTHR13121	GPI TRANSAMIDASE COMPONENT PIG-U	catalytic activity, acting on a protein	protein localization to cell surface	catalytic complex	-
W5PK66	W5PK66	PTHR48094:SF13	BNAA06G01020D PROTEIN	-	-	-	-
W5PKD3	W5PKD3	PTHR11711:SF322	ADP-RIBOSYLATION FACTOR 6A	GTP binding	vesicle-mediated transport	cytoplasm	G-protein
W5PKK8	W5PKK8	PTHR46220:SF15	CALCIUM-DEPENDENT ARF-TYPE GTPASE ACTIVATING FAMILY PROTEIN	-	-	-	-
W5PKS6	W5PKS6	PTHR13468:SF15	ABC TRANSPORTER F FAMILY MEMBER 4-LIKE ISOFORM X1	histone binding	regulation of double-strand break repair	nucleus	chromatin/chromatin-binding, or -regulatory protein
W5PLB7	W5PLB7	PTHR11022:SF65	PEPTIDOGLYCAN RECOGNITION PROTEIN 5	-	-	-	-
W5PLB9	W5PLB9	PTHR10678:SF4	26S PROTEASOME NON-ATPASE REGULATORY SUBUNIT 11B	-	proteasome assembly	proteasome regulatory particle, lid subcomplex	-
W5PLF3	W5PLF3	PTHR48107:SF10	SUBFAMILY NOT NAMED	-	-	-	-
W5PLL2	W5PLL2	PTHR24253:SF63	SERINE PROTEASE P84	-	-	-	serine protease
W5PM66	W5PM66	PTHR12743:SF0	CYTOCHROME C-TYPE HEME LYASE	lyase activity	cellular protein modification process	mitochondrion	lyase
W5PMH6	W5PMH6	PTHR11430:SF77	LIPOCALIN-LIKE 1 PROTEIN	-	-	-	transfer/carrier protein
W5PMR1	W5PMR1	PTHR11442:SF48	HEMOGLOBIN SUBUNIT ALPHA	protein binding	reactive oxygen species metabolic process	extracellular space	-
W5PN24	W5PN24	PTHR43721:SF24	ELONGATION FACTOR TU	translation regulator activity	mitochondrial translation	mitochondrion	translation elongation factor
W5PNK3	W5PNK3	PTHR22802:SF394	COLLECTIN SUBFAMILY MEMBER 12	-	-	-	membrane traffic protein
W5PNN2	W5PNN2	PTHR22804:SF11	HYALURONAN AND PROTEOGLYCAN LINK PROTEIN 4	-	central nervous system development	extracellular matrix	extracellular matrix glycoprotein
W5PNT5	W5PNT5	PTHR14145:SF5	BNAA09G38820D PROTEIN	-	-	COP9 signalosome	-
W5PNV3	W5PNV3	PTHR23359:SF206	UMP-CMP KINASE	-	-	-	nucleotide kinase
W5PNW7	W5PNW7	PTHR23239:SF120	KERATIN, TYPE I CYTOSKELETAL 27	-	-	-	-
W5PP28	W5PP28	PTHR11216:SF128	EH DOMAIN-CONTAINING PROTEIN 1-LIKE	-	-	-	membrane traffic protein
W5PP33	W5PP33	PTHR14002	ENDOGLIN/TGF-BETA RECEPTOR TYPE III	-	-	-	-
W5PP34	W5PP34	PTHR47979:SF38	RAB2A, MEMBER RAS ONCOGENE FAMILY	-	-	Golgi apparatus	-
W5PP77	W5PP77	PTHR46036:SF13	LACTOYLGLUTATHIONE LYASE, CHLOROPLASTIC-RELATED	lyase activity	aldehyde catabolic process	cytoplasm	-
W5PPJ0	W5PPJ0	PTHR13872:SF46	BNAA05G18450D PROTEIN	-	-	-	glycosyltransferase
W5PPT6	W5PPT6	PTHR11588:SF408	TUBULIN ALPHA CHAIN	GTP binding	mitotic nuclear division	cytoplasm	tubulin
W5PPU0	W5PPU0	PTHR42760:SF87	ALCOHOL DEHYDROGENASE (AFU_ORTHOLOGUE AFUA_7G04360)	oxidoreductase activity, acting on the CH-OH group of donors, NAD or NADP as acceptor	oxidation-reduction process	-	oxidoreductase
W5PQK3	W5PQK3	PTHR45770:SF33	ATP-DEPENDENT 6-PHOSPHOFRUCTOKINASE 7	intramolecular transferase activity	-	cytoplasm	-
W5PQK6	W5PQK6	PTHR47133	TALIN ROD DOMAIN-CONTAINING PROTEIN 1	-	-	-	-
W5PR44	W5PR44	PTHR13338	UPF0240 PROTEIN	-	mitochondrial respiratory chain complex I assembly	mitochondrion	-
W5PR48	W5PR48	PTHR43363:SF2	PHOSPHORIBOSYLTRANSFERASE	-	-	-	-
W5PRR0	W5PRR0	PTHR23023:SF78	DIMETHYLANILINE MONOOXYGENASE [N-OXIDE-FORMING] 5	oxidoreductase activity, acting on paired donors, with incorporation or reduction of molecular oxygen, NAD(P)H as one donor, and incorporation of one atom of oxygen	-	-	oxygenase
W5PRR2	W5PRR2	PTHR10822:SF30	DALLY-LIKE, ISOFORM A	-	regulation of protein localization to membrane	cell surface	-
W5PS39	W5PS39	PTHR12203:SF93	MOTIF-CONTAINING PROTEIN 1, PUTATIVE-RELATED	-	-	-	-
W5PS52	W5PS52	PTHR15028	CD72-RELATED	-	-	-	-
W5PS88	W5PS88	PTHR11879:SF4	ASPARTATE AMINOTRANSFERASE	transferase activity	alpha-amino acid metabolic process	mitochondrion	-
W5PSA6	W5PSA6	PTHR16056:SF4	REGULATOR OF MICROTUBULE DYNAMICS PROTEIN 1	-	-	-	-
W5PU75	W5PU75	PTHR10218:SF116	G PROTEIN, ALPHA SUBUNIT	G protein-coupled receptor binding	regulation of cAMP-mediated signaling	catalytic complex	heterotrimeric G-protein
W5PUA9	W5PUA9	PTHR22573	PHOSPHOHEXOMUTASE FAMILY MEMBER	intramolecular transferase activity	glycogen biosynthetic process	cytosol	-
W5PUD8	W5PUD8	PTHR14237:SF19	MOLYBDENUM COFACTOR SULFURASE	-	-	-	-
W5PUT6	W5PUT6	PTHR23323	VACUOLAR PROTEIN SORTING-ASSOCIATED PROTEIN	protein binding, bridging	vesicle fusion to plasma membrane	membrane protein complex	membrane trafficking regulatory protein
W5PUV3	W5PUV3	PTHR11575:SF24	RIKEN CDNA 4933425L06	-	-	-	phosphodiesterase
W5PUX9	W5PUX9	PTHR45985:SF5	CHLD3	-	-	-	-
W5PV56	W5PV56	PTHR10183:SF30	CALPAIN-10	calcium-dependent cysteine-type endopeptidase activity	proteolysis	cytoplasm	cysteine protease
W5PWG1	W5PWG1	PTHR43650:SF17	PYROPHOSPHATE--FRUCTOSE 6-PHOSPHATE 1-PHOSPHOTRANSFERASE SUBUNIT ALPHA 1	carbohydrate kinase activity	response to organic substance	cytosol	carbohydrate kinase
W5PWM2	W5PWM2	PTHR12703	TRANSMEMBRANE PROTEIN 33	-	membrane organization	endoplasmic reticulum	-
W5PWQ4	W5PWQ4	PTHR23281	MERLIN/MOESIN/EZRIN/RADIXIN	-	-	-	actin or actin-binding cytoskeletal protein
W5PX34	W5PX34	PTHR46234:SF8	ALPHA/BETA-HYDROLASES SUPERFAMILY PROTEIN	-	-	-	-
W5PXC6	W5PXC6	PTHR16675:SF3	IGG RECEPTOR FCRN LARGE SUBUNIT P51	protein binding	-	-	-
W5PXE5	W5PXE5	PTHR23073:SF118	PARTICLE TRIPLE-A 1A, PUTATIVE-RELATED	TBP-class protein binding	RNA polymerase II preinitiation complex assembly	proteasome regulatory particle, base subcomplex	protease
W5PYS8	W5PYS8	PTHR11412:SF133	MURINOGLOBULIN-1-RELATED	endopeptidase inhibitor activity	-	-	protease inhibitor
W5PZS7	W5PZS7	PTHR11461:SF343	HETEROCHROMATIN-ASSOCIATED PROTEIN MENT-RELATED	endopeptidase inhibitor activity	proteolysis	extracellular space	protease inhibitor
W5Q038	W5Q038	PTHR35846	PROTEIN CBG05131	-	-	-	-
W5Q0C6	W5Q0C6	PTHR10083:SF353	SALIVARY GLAND PEPTIDE, PUTATIVE-RELATED	endopeptidase inhibitor activity	-	extracellular space	protease inhibitor
W5Q0L2	W5Q0L2	PTHR11461	SERINE PROTEASE INHIBITOR, SERPIN	-	-	-	protease inhibitor
W5Q0N0	W5Q0N0	PTHR11071:SF499	PEPTIDYL-PROLYL CIS-TRANS ISOMERASE	catalytic activity, acting on a protein	protein folding	-	-
W5Q0R4	W5Q0R4	PTHR45640:SF8	HEAT SHOCK PROTEIN HSP-12.2	-	-	-	-
W5Q0X5	W5Q0X5	PTHR11461:SF32	ALPHA-1-ANTITRYPSIN 1-6	endopeptidase inhibitor activity	proteolysis	extracellular space	protease inhibitor
W5Q124	W5Q124	PTHR11461:SF314	SERPIN-ZXA-LIKE	endopeptidase inhibitor activity	proteolysis	extracellular space	protease inhibitor
W5Q1R1	W5Q1R1	PTHR11099:SF0	VACUOLAR PROTEIN SORTING-ASSOCIATED PROTEIN 35	-	intracellular protein transport	membrane protein complex	membrane traffic protein
W5Q284	W5Q284	PTHR10225:SF2	LYMPHATIC VESSEL ENDOTHELIAL HYALURONIC ACID RECEPTOR 1	carboxylic acid binding	-	plasma membrane	transmembrane signal receptor
W5Q2C8	W5Q2C8	PTHR48065:SF10	OS12G0559400 PROTEIN	-	-	-	-
W5Q2D9	W5Q2D9	PTHR47980:SF42	RAS-RELATED PROTEIN RAB-13	-	cellular response to insulin stimulus	endosome	-
W5Q2E1	W5Q2E1	PTHR48054:SF33	RECEPTOR-LIKE PROTEIN KINASE	-	-	-	-
W5Q2E8	W5Q2E8	PTHR42940	ALCOHOL DEHYDROGENASE 1-RELATED	oxidoreductase activity, acting on the CH-OH group of donors, NAD or NADP as acceptor	oxidation-reduction process	cytoplasm	-
W5Q2N2	W5Q2N2	PTHR10855:SF1	26S PROTEASOME NON-ATPASE REGULATORY SUBUNIT 12	-	proteasome-mediated ubiquitin-dependent protein catabolic process	cytoplasm	protease
W5Q2T7	W5Q2T7	PTHR19353:SF35	NADPH-DEPENDENT STEAROYL-COA 9-DESATURASE	-	-	-	-
W5Q337	W5Q337	PTHR10293:SF40	GLUTAREDOXIN-3	-	cellular iron ion homeostasis	nucleus	reductase
W5Q3E0	W5Q3E0	PTHR19226:SF3	SI:DKEYP-69C1.7	-	-	-	cell adhesion molecule
W5Q3F9	W5Q3F9	PTHR11908:SF149	BNAA06G20180D PROTEIN	-	-	-	oxidoreductase
W5Q438	W5Q438	PTHR22844	F-BOX AND WD40 DOMAIN PROTEIN	-	-	-	-
W5Q4Q3	W5Q4Q3	PTHR11461:SF39	THYROXINE-BINDING GLOBULIN	endopeptidase inhibitor activity	proteolysis	extracellular space	protease inhibitor
W5Q501	W5Q501	PTHR10218:SF73	GUANINE NUCLEOTIDE-BINDING PROTEIN G(I) SUBUNIT ALPHA-2	G protein-coupled receptor binding	regulation of cAMP-mediated signaling	catalytic complex	heterotrimeric G-protein
W5Q537	W5Q537	PTHR46332:SF1	ASPARTATE BETA-HYDROXYLASE DOMAIN-CONTAINING PROTEIN 1	-	-	-	-
W5Q548	W5Q548	PTHR22811:SF46	PROTEIN ERP3	-	maintenance of location	COPII-coated ER to Golgi transport vesicle	vesicle coat protein
W5Q5G8	W5Q5G8	PTHR43522:SF10	TRANSKETOLASE	transferase activity	generation of precursor metabolites and energy	cytosol	transketolase
W5Q5H8	W5Q5H8	PTHR19143:SF189	FIBROLEUKIN	-	-	-	intercellular signal molecule
W5Q691	W5Q691	PTHR43540	PEROXYUREIDOACRYLATE/UREIDOACRYLATE AMIDOHYDROLASE-RELATED	-	-	-	hydrolase
W5Q6H1	W5Q6H1	PTHR12268:SF24	UTROPHIN	-	-	-	-
W5Q6Q7	W5Q6Q7	PTHR10809:SF105	VESICLE-ASSOCIATED MEMBRANE-PROTEIN-ASSOCIATED PROTEIN-RELATED	-	membrane organization	endoplasmic reticulum membrane	membrane trafficking regulatory protein
W5Q7G2	W5Q7G2	PTHR10218:SF247	GUANINE NUCLEOTIDE-BINDING PROTEIN ALPHA-6 SUBUNIT	G protein-coupled receptor binding	regulation of cAMP-mediated signaling	catalytic complex	heterotrimeric G-protein
W5Q7J0	W5Q7J0	PTHR13769	APOLIPOPROTEIN B	-	-	-	-
W5Q7T0	W5Q7T0	PTHR42912:SF21	METHYLTRANSFERASE-LIKE PROTEIN 7A	methyltransferase activity	-	-	methyltransferase
W5Q8J9	W5Q8J9	PTHR11581:SF31	40S RIBOSOMAL PROTEIN S4	RNA binding	translational elongation	cytosolic small ribosomal subunit	ribosomal protein
W5Q8M3	W5Q8M3	PTHR10569	GLYCOGEN DEBRANCHING ENZYME	transferase activity, transferring hexosyl groups	glycogen metabolic process	-	glycosyltransferase
W5Q8Q7	W5Q8Q7	PTHR12640	RIBOPHORIN II	oligosaccharyl transferase activity	protein N-linked glycosylation	oligosaccharyltransferase complex	glycosyltransferase
W5Q8S1	W5Q8S1	PTHR18884:SF69	LD28935P-RELATED	GTPase activity	cytoskeleton-dependent cytokinesis	microtubule cytoskeleton	cytoskeletal protein
W5Q9C5	W5Q9C5	PTHR11533:SF274	AMINOPEPTIDASE	zinc ion binding	peptide metabolic process	cytoplasm	metalloprotease
W5Q9E1	W5Q9E1	PTHR45984:SF1	RNA (RNA) POLYMERASE II ASSOCIATED PROTEIN HOMOLOG	heat shock protein binding	protein targeting to mitochondrion	mitochondrion	-
W5Q9M9	W5Q9M9	PTHR10196:SF82	GH12641P	phosphotransferase activity, alcohol group as acceptor	cellular carbohydrate metabolic process	mitochondrion	carbohydrate kinase
W5Q9U3	W5Q9U3	PTHR10156	2',3'-CYCLIC-NUCLEOTIDE 3'-PHOSPHODIESTERASE	cyclic-nucleotide phosphodiesterase activity	-	cytoplasm	phosphodiesterase
W5Q9W3	W5Q9W3	PTHR24220:SF662	ABC TRANSPORTER ATP-BINDING PROTEIN	transmembrane transporter activity	transmembrane transport	plasma membrane	ATP-binding cassette (ABC) transporter
W5QAA3	W5QAA3	PTHR46958	B-CELL RECEPTOR CD22	-	-	-	-
W5QAB1	W5QAB1	PTHR10201:SF115	MATRIX METALLOPROTEINASE-27	metalloendopeptidase activity	catabolic process	-	metalloprotease
W5QAN8	W5QAN8	PTHR19325:SF523	P-SELECTIN-LIKE	-	-	-	-
W5QB02	W5QB02	PTHR11590:SF73	TRANSGLUTAMINASE 2,-LIKE	catalytic activity, acting on a protein	cellular protein modification process	collagen-containing extracellular matrix	transferase
W5QB08	W5QB08	PTHR10218:SF321	EXTRA-LARGE GUANINE NUCLEOTIDE-BINDING PROTEIN 2	G protein-coupled receptor binding	regulation of cAMP-mediated signaling	catalytic complex	heterotrimeric G-protein
W5QB24	W5QB24	PTHR45973:SF12	DYNEIN REGULATORY COMPLEX SUBUNIT 3	-	-	-	-
W5QB58	W5QB58	PTHR11133	SACCHAROPINE DEHYDROGENASE	-	-	-	-
W5QBI9	W5QBI9	PTHR10502:SF120	ANNEXIN	-	response to acid chemical	-	calcium-binding protein
W5QBM4	W5QBM4	PTHR10075:SF74	SI:DKEYP-97A10.3	protein binding	cell-cell adhesion via plasma-membrane adhesion molecules	plasma membrane region	scaffold/adaptor protein
W5QBV3	W5QBV3	PTHR11406:SF0	PHOSPHOGLYCERATE KINASE	ATP binding	positive regulation of phosphorylation	cytosol	carbohydrate kinase
W5QBW5	W5QBW5	PTHR10504	BACTERICIDAL PERMEABILITY-INCREASING BPI PROTEIN-RELATED	-	-	-	-
W5QC41	W5QC41	PTHR11817:SF72	PYRUVATE KINASE	intramolecular transferase activity	glycolytic process	cytoplasm	-
W5QCG3	W5QCG3	PTHR34093	CHLORIDE CHANNEL CLIC-LIKE PROTEIN 1	chloride channel activity	chloride transmembrane transport	endoplasmic reticulum	-
W5QCP9	W5QCP9	PTHR24023:SF986	SUBFAMILY NOT NAMED	-	-	-	extracellular matrix structural protein
W5QCV4	W5QCV4	PTHR42760:SF37	CLAVALDEHYDE DEHYDROGENASE	oxidoreductase activity, acting on the CH-OH group of donors, NAD or NADP as acceptor	oxidation-reduction process	-	oxidoreductase
W5QCY6	W5QCY6	PTHR11911:SF124	INOSINE-5'-MONOPHOSPHATE DEHYDROGENASE 1	oxidoreductase activity, acting on the CH-OH group of donors, NAD or NADP as acceptor	purine ribonucleotide biosynthetic process	cytoplasm	dehydrogenase
W5QD41	W5QD41	PTHR10660:SF2	LD45860P	peptidase activator activity	regulation of proteasomal protein catabolic process	cytoplasm	-
W5QD75	W5QD75	PTHR10218:SF316	GUANINE NUCLEOTIDE-BINDING PROTEIN G(Q) SUBUNIT ALPHA	G protein-coupled receptor binding	regulation of cAMP-mediated signaling	catalytic complex	heterotrimeric G-protein
W5QDB4	W5QDB4	PTHR11571:SF224	HEMATOPOIETIC PROSTAGLANDIN D SYNTHASE	transferase activity, transferring alkyl or aryl (other than methyl) groups	glutathione metabolic process	-	-
W5QFL1	W5QFL1	PTHR11588:SF325	TUBULIN BETA-2 CHAIN	GTP binding	mitotic nuclear division	cytoplasm	tubulin
W5QFN9	W5QFN9	PTHR11952	UDP- GLUCOSE PYROPHOSPHORYLASE	-	-	-	-
W5QFP2	W5QFP2	PTHR11467:SF24	HISTONE H1.5	chromatin DNA binding	nucleosome organization	nuclear chromatin	histone
W5QG71	W5QG71	PTHR11761:SF22	60S RIBOSOMAL PROTEIN L23	structural constituent of ribosome	-	cytosolic large ribosomal subunit	ribosomal protein
W5QGD1	W5QGD1	PTHR43128:SF14	L-LACTATE DEHYDROGENASE	-	-	-	dehydrogenase
W5QGI4	W5QGI4	PTHR10947	PHENYLALANYL-TRNA SYNTHETASE BETA CHAIN AND LEUCINE-RICH REPEAT-CONTAINING PROTEIN 47	ligase activity	cellular amino acid metabolic process	catalytic complex	aminoacyl-tRNA synthetase
W5QGX9	W5QGX9	PTHR21136:SF197	BNAA08G05870D PROTEIN	-	-	-	SNARE protein
W5QHP5	W5QHP5	PTHR13720:SF39	SUBFAMILY NOT NAMED	-	-	-	-
W5QI03	W5QI03	PTHR19269:SF38	TROPOMYOSIN ALPHA-3 CHAIN	actin filament binding	muscle contraction	actin filament	actin binding motor protein
W5QJA2	W5QJA2	PTHR45617	FAMILY NOT NAMED	-	-	-	-

## Sheet: Sheet C - Charts
CON__ENSEMBL:ENSBTAP0014147	CON__ENSEMBL:ENSBTAP0014147		Protein Class
C4	CON__P01030		transmembrane signal receptor (PC00197)	1	0.005	0.008
C4BPA	CON__Q28065		defense/immunity protein (PC00090)	1	0.005	0.008
P00349	6PGD_SHEEP		intercellular signal molecule (PC00207)	1	0.005	0.008
P02075	HBB_SHEEP		chromatin/chromatin-binding, or -regulatory protein (PC00077)	1	0.005	0.008
P32262	ANT3_SHEEP		scaffold/adaptor protein (PC00226)	2	0.009	0.016
P50751	TNNT2_SHEEP		cell adhesion molecule (PC00069)	2	0.009	0.016
P54230	CTHL1_SHEEP		nucleic acid binding protein (PC00171)	2	0.009	0.016
P62896	CYC_SHEEP		transporter (PC00227)	3	0.014	0.023
P83205	CATB_SHEEP		transfer/carrier protein (PC00219)	3	0.014	0.023
Q2TCH3	ACLY_SHEEP		calcium-binding protein (PC00060)	3	0.014	0.023
Q6B3Y2	CAV1_SHEEP		extracellular matrix protein (PC00102)	5	0.023	0.039
Q9MZA9	VIME_SHEEP		membrane traffic protein (PC00150)	8	0.036	0.063
Q9XSM2	TRYT_SHEEP		translational protein (PC00263)	10	0.045	0.078
Q9XT27	CERU_SHEEP		cytoskeletal protein (PC00085)	12	0.054	0.094
P79360	P79360_SHEEP		protein modifying enzyme (PC00260)	15	0.068	0.117
W5NQP9	W5NQP9_SHEEP		protein-binding activity modulator (PC00095)	21	0.095	0.164
W5NR63	W5NR63_SHEEP		metabolite interconversion enzyme (PC00262)	38	0.171	0.297
W5NRD4	W5NRD4_SHEEP
W5NRG7	W5NRG7_SHEEP		Cellular Component
W5NRH5	W5NRH5_SHEEP		cell junction (GO:0030054)	1	0.005	0.002
W5NRI1	W5NRI1_SHEEP		synapse part (GO:0044456)	2	0.009	0.005
W5NRW4	W5NRW4_SHEEP		synapse (GO:0045202)	2	0.009	0.005
W5NS44	W5NS44_SHEEP		membrane-enclosed lumen (GO:0031974)	7	0.032	0.017
W5NS65	W5NS65_SHEEP		supramolecular complex (GO:0099080)	8	0.036	0.019
W5NSP2	W5NSP2_SHEEP		extracellular region part (GO:0044421)	17	0.077	0.04
W5NT24	W5NT24_SHEEP		extracellular region (GO:0005576)	17	0.077	0.04
W5NTE7	W5NTE7_SHEEP		membrane part (GO:0044425)	21	0.095	0.05
W5NTS5	W5NTS5_SHEEP		membrane (GO:0016020)	30	0.135	0.071
W5NU76	W5NU76_SHEEP		protein-containing complex (GO:0032991)	31	0.14	0.074
W5NUL7	W5NUL7_SHEEP		organelle part (GO:0044422)	34	0.153	0.081
W5NUQ4	W5NUQ4_SHEEP		organelle (GO:0043226)	57	0.257	0.135
W5NUV1	W5NUV1_SHEEP		cell (GO:0005623)	97	0.437	0.23
W5NV70	W5NV70_SHEEP		cell part (GO:0044464)	97	0.437	0.23
W5NVB2	W5NVB2_SHEEP
W5NWF7	W5NWF7_SHEEP		Biological Process
W5NWM5	W5NWM5_SHEEP		reproductive process (GO:0022414)	1	0.005	0.003
W5NX51	W5NX51_SHEEP		multi-organism process (GO:0051704)	1	0.005	0.003
W5NXC0	W5NXC0_SHEEP		reproduction (GO:0000003)	1	0.005	0.003
W5NXJ3	W5NXJ3_SHEEP		biological adhesion (GO:0022610)	2	0.009	0.007
W5NXP6	W5NXP6_SHEEP		locomotion (GO:0040011)	2	0.009	0.007
W5NY01	W5NY01_SHEEP		growth (GO:0040007)	2	0.009	0.007
W5NY29	W5NY29_SHEEP		signaling (GO:0023052)	5	0.023	0.017
W5NY95	W5NY95_SHEEP		developmental process (GO:0032502)	6	0.027	0.02
W5NYQ9	W5NYQ9_SHEEP		multicellular organismal process (GO:0032501)	8	0.036	0.027
W5NZ80	W5NZ80_SHEEP		response to stimulus (GO:0050896)	12	0.054	0.041
W5NZ87	W5NZ87_SHEEP		localization (GO:0051179)	23	0.104	0.078
W5NZR9	W5NZR9_SHEEP		biological regulation (GO:0065007)	32	0.144	0.108
W5NZX9	W5NZX9_SHEEP		cellular component organization or biogenesis (GO:0071840)	36	0.162	0.122
W5P094	W5P094_SHEEP		metabolic process (GO:0008152)	69	0.311	0.233
W5P0Q4	W5P0Q4_SHEEP		cellular process (GO:0009987)	96	0.432	0.324
W5P0T6	W5P0T6_SHEEP
W5P1S3	W5P1S3_SHEEP		Molecular Function
W5P1S6	W5P1S6_SHEEP		molecular transducer activity (GO:0060089)	1	0.005	0.006
W5P1X9	W5P1X9_SHEEP		translation regulator activity (GO:0045182)	2	0.009	0.012
W5P214	W5P214_SHEEP		transporter activity (GO:0005215)	8	0.036	0.049
W5P2A5	W5P2A5_SHEEP		structural molecule activity (GO:0005198)	9	0.041	0.055
W5P2A9	W5P2A9_SHEEP		molecular function regulator (GO:0098772)	12	0.054	0.073
W5P323	W5P323_SHEEP		binding (GO:0005488)	58	0.261	0.354
W5P3I5	W5P3I5_SHEEP		catalytic activity (GO:0003824)	74	0.333	0.451
W5P3R3	W5P3R3_SHEEP
W5P4C0	W5P4C0_SHEEP
W5P4I6	W5P4I6_SHEEP
W5P500	W5P500_SHEEP
W5P564	W5P564_SHEEP
W5P5A0	W5P5A0_SHEEP
W5P5H0	W5P5H0_SHEEP
W5P5I0	W5P5I0_SHEEP
W5P5Q1	W5P5Q1_SHEEP
W5P5W9	W5P5W9_SHEEP
W5P612	W5P612_SHEEP
W5P6F4	W5P6F4_SHEEP
W5P6P2	W5P6P2_SHEEP
W5P6Q5	W5P6Q5_SHEE
W5P7G4	W5P7G4_SHEEP
W5P8W6	W5P8W6_SHEEP
W5P8X9	W5P8X9_SHEEP
W5P994	W5P994_SHEEP
W5PB83	W5PB83_SHEEP
W5PBG4	W5PBG4_SHEEP
W5PBP1	W5PBP1_SHEEP
W5PBY2	W5PBY2_SHEEP
W5PC00	W5PC00_SHEEP
W5PC25	W5PC25_SHEEP
W5PDE5	W5PDE5_SHEEP
W5PDG3	W5PDG3_SHEEP
W5PDL1	W5PDL1_SHEEP
W5PDS4	W5PDS4_SHEEP
W5PE27	W5PE27_SHEEP
W5PE53	W5PE53_SHEEP
W5PEC5	W5PEC5_SHEEP
W5PEE7	W5PEE7_SHEEP
W5PEP0	W5PEP0_SHEEP
W5PEV6	W5PEV6_SHEEP
W5PF02	W5PF02_SHEEP
W5PF65	W5PF65_SHEEP
W5PG09	W5PG09_SHEEP
W5PG71	W5PG71_SHEEP
W5PGK1	W5PGK1_SHEEP
W5PGR8	W5PGR8_SHEEP
W5PGT6	W5PGT6_SHEEP
W5PH02	W5PH02_SHEEP
W5PH55	W5PH55_SHEEP
W5PHF2	W5PHF2_SHEEP
W5PHI7	W5PHI7_SHEEP
W5PHI8	W5PHI8_SHEEP
W5PHP7	W5PHP7_SHEEP
W5PHX1	W5PHX1_SHEEP
W5PI17	W5PI17_SHEEP
W5PIG7	W5PIG7_SHEEP
W5PIN6	W5PIN6_SHEEP
W5PJ14	W5PJ14_SHEEP
W5PJ75	W5PJ75_SHEEP
W5PJB6	W5PJB6_SHEEP
W5PJG0	W5PJG0_SHEEP
W5PK04	W5PK04_SHEEP
W5PK54	W5PK54_SHEEP
W5PK66	W5PK66_SHEEP
W5PKD3	W5PKD3_SHEEP
W5PKK8	W5PKK8_SHEEP
W5PKS6	W5PKS6_SHEEP
W5PLB7	W5PLB7_SHEEP
W5PLB9	W5PLB9_SHEEP
W5PLF3	W5PLF3_SHEEP
W5PLL2	W5PLL2_SHEEP
W5PM66	W5PM66_SHEEP
W5PMH6	W5PMH6_SHEEP
W5PMR1	W5PMR1_SHEEP
W5PN24	W5PN24_SHEEP
W5PNK3	W5PNK3_SHEEP
W5PNN2	W5PNN2_SHEEP
W5PNT5	W5PNT5_SHEEP
W5PNV3	W5PNV3_SHEEP
W5PNW7	W5PNW7_SHEEP
W5PP28	W5PP28_SHEEP
W5PP33	W5PP33_SHEEP
W5PP34	W5PP34_SHEEP
W5PP64	W5PP64_SHEEP
W5PP77	W5PP77_SHEEP
W5PPJ0	W5PPJ0_SHEEP
W5PPT6	W5PPT6_SHEEP
W5PPU0	W5PPU0_SHEEP
W5PQK3	W5PQK3_SHEEP
W5PQK6	W5PQK6_SHEEP
W5PR44	W5PR44_SHEEP
W5PR48	W5PR48_SHEEP
W5PRR0	W5PRR0_SHEEP
W5PRR2	W5PRR2_SHEEP
W5PS39	W5PS39_SHEEP
W5PS52	W5PS52_SHEEP
W5PS88	W5PS88_SHEEP
W5PSA6	W5PSA6_SHEEP
W5PTG9	W5PTG9_SHEEP
W5PU75	W5PU75_SHEEP
W5PUA9	W5PUA9_SHEEP
W5PUD8	W5PUD8_SHEEP
W5PUH7	W5PUH7_SHEEP
W5PUT6	W5PUT6_SHEEP
W5PUV3	W5PUV3_SHEEP
W5PUX9	W5PUX9_SHEEP
W5PV56	W5PV56_SHEEP
W5PWG1	W5PWG1_SHEEP
W5PWH8	W5PWH8_SHEEP
W5PWM2	W5PWM2_SHEEP
W5PWQ4	W5PWQ4_SHEEP
W5PX34	W5PX34_SHEEP
W5PXC6	W5PXC6_SHEEP
W5PXE5	W5PXE5_SHEEP
W5PYQ9	W5PYQ9_SHEEP
W5PYS8	W5PYS8_SHEEP
W5PZS7	W5PZS7_SHEEP
W5Q038	W5Q038_SHEEP
W5Q0C6	W5Q0C6_SHEEP
W5Q0L2	W5Q0L2_SHEEP
W5Q0N0	W5Q0N0_SHEEP
W5Q0R4	W5Q0R4_SHEEP
W5Q0X5	W5Q0X5_SHEEP
W5Q124	W5Q124_SHEEP
W5Q1R1	W5Q1R1_SHEEP
W5Q284	W5Q284_SHEEP
W5Q2C8	W5Q2C8_SHEEP
W5Q2D9	W5Q2D9_SHEEP
W5Q2E1	W5Q2E1_SHEEP
W5Q2E8	W5Q2E8_SHEEP
W5Q2N2	W5Q2N2_SHEEP
W5Q2T7	W5Q2T7_SHEEP
W5Q337	W5Q337_SHEEP
W5Q3E0	W5Q3E0_SHEEP
W5Q3F9	W5Q3F9_SHEEP
W5Q3Y4	W5Q3Y4_SHEEP
W5Q438	W5Q438_SHEEP
W5Q4Q3	W5Q4Q3_SHEEP
W5Q501	W5Q501_SHEEP
W5Q537	W5Q537_SHEEP
W5Q548	W5Q548_SHEEP
W5Q5F5	W5Q5F5_SHEEP
W5Q5G8	W5Q5G8_SHEEP
W5Q5H8	W5Q5H8_SHEEP
W5Q691	W5Q691_SHEEP
W5Q6H1	W5Q6H1_SHEEP
W5Q6Q7	W5Q6Q7_SHEEP
W5Q7G2	W5Q7G2_SHEEP
W5Q7J0	W5Q7J0_SHEEP
W5Q7T0	W5Q7T0_SHEEP
W5Q8J9	W5Q8J9_SHEEP
W5Q8M3	W5Q8M3_SHEEP
W5Q8Q7	W5Q8Q7_SHEEP
W5Q8S1	W5Q8S1_SHEEP
W5Q9C5	W5Q9C5_SHEEP
W5Q9E1	W5Q9E1_SHEEP
W5Q9M9	W5Q9M9_SHEEP
W5Q9U3	W5Q9U3_SHEEP
W5Q9W3	W5Q9W3_SHEEP
W5QAA3	W5QAA3_SHEEP
W5QAB1	W5QAB1_SHEEP
W5QAN8	W5QAN8_SHEEP
W5QAQ0	W5QAQ0_SHEEP
W5QB02	W5QB02_SHEEP
W5QB08	W5QB08_SHEEP
W5QB24	W5QB24_SHEEP
W5QB58	W5QB58_SHEEP
W5QBI9	W5QBI9_SHEEP
W5QBM4	W5QBM4_SHEEP
W5QBV3	W5QBV3_SHEEP
W5QBW5	W5QBW5_SHEEP
W5QC41	W5QC41_SHEEP
W5QCG3	W5QCG3_SHEEP
W5QCP9	W5QCP9_SHEEP
W5QCV4	W5QCV4_SHEEP
W5QCY6	W5QCY6_SHEEP
W5QD41	W5QD41_SHEEP
W5QD75	W5QD75_SHEEP
W5QDB4	W5QDB4_SHEEP
W5QDG8	W5QDG8_SHEEP
W5QFL1	W5QFL1_SHEEP
W5QFN9	W5QFN9_SHEEP
W5QFP2	W5QFP2_SHEEP
W5QFQ0	W5QFQ0_SHEEP
W5QG71	W5QG71_SHEEP
W5QGD1	W5QGD1_SHEEP
W5QGI4	W5QGI4_SHEEP
W5QGX9	W5QGX9_SHEEP
W5QHP5	W5QHP5_SHEEP
W5QI03	W5QI03_SHEEP
W5QI04	W5QI04_SHEEP
W5QIT7	W5QIT7_SHEEP
W5QJA2	W5QJA2_SHEEP
